1 Classification: Life Sciences, Microbiology

2

3 **A semi-lethal CRISPR-Cas system permits DNA acquisition in *Enterococcus faecalis***

4

5 Karthik Hullahalli<sup>1</sup>, Marinelle Rodrigues<sup>1</sup>, Uyen Thy Nguyen<sup>1</sup>, and Kelli Palmer<sup>1</sup>

6

7 1. Department of Biological Sciences, The University of Texas at Dallas. 800 W. Campbell  
8 Road. Richardson, TX, 75080

9

10

11 Contact information for corresponding author:

12

13 Kelli Palmer [kelli.palmer@utdallas.edu](mailto:kelli.palmer@utdallas.edu)

14 800 W. Campbell Road. Richardson, TX, 75080

15

16 Keywords: CRISPR, *Enterococcus faecalis*, genome editing

17

18

19

20

21

22

23

24

25

26

## 27 **Abstract**

28 Antibiotic resistant bacteria are critical public health concerns. Among the prime causative factors  
29 for the spread of antibiotic resistance is horizontal gene transfer (HGT). A useful model organism  
30 for investigating the relationship between HGT and antibiotic resistance is the opportunistic  
31 pathogen *Enterococcus faecalis*, since the species possesses highly conjugative plasmids that  
32 readily disseminate antibiotic resistance genes and virulence factors in nature. Unlike many  
33 commensal *E. faecalis* strains, the genomes of multidrug-resistant (MDR) *E. faecalis* clinical  
34 isolates are enriched for mobile genetic elements (MGEs) and lack CRISPR-Cas genome defense  
35 systems. CRISPR-Cas systems cleave foreign DNA in a programmable, sequence-specific  
36 manner and are disadvantageous for MGE-derived genome expansion. A unique facet of CRISPR  
37 biology in *E. faecalis* is that MGEs that are targeted by native CRISPR-Cas systems can be  
38 transiently maintained. Here, we investigate the basis for this "CRISPR tolerance." We observe  
39 that *E. faecalis* can maintain self-targeting constructs that direct Cas9 to cleave the chromosome,  
40 but at a fitness cost. Interestingly, no canonical DNA damage response was observed during self-  
41 targeting, but integrated prophages were strongly induced. We determined that low *cas9*  
42 expression is the genetic basis for this transient non-lethality and use this knowledge to develop  
43 a robust genome editing scheme. Our discovery of a semi-lethal CRISPR-Cas system suggests  
44 that *E. faecalis* has maximized the potential for DNA acquisition by attenuating its CRISPR  
45 machinery, thereby facilitating acquisition of potentially beneficial MGEs that may otherwise be  
46 restricted by genome defense.

47

48

## 49 **Significance Statement**

50 CRISPR-Cas has provided a powerful toolkit to manipulate bacteria, resulting in improved genetic  
51 manipulations and novel antimicrobials. These powerful applications rely on the premise that  
52 CRISPR-Cas chromosome targeting, which leads to double-stranded DNA breaks, is lethal. In

53 this study, we show that chromosomal CRISPR targeting in *Enterococcus faecalis* is transiently  
54 non-lethal, the first demonstration of such a phenomenon. We uncover novel phenotypes  
55 associated with this “CRISPR tolerance” and, after determining its genetic basis, develop a  
56 genome editing platform in *E. faecalis* with negligible off-target effects. Our findings reveal a novel  
57 strategy exploited by a bacterial pathogen to cope with CRISPR-induced conflicts to more readily  
58 accept DNA, and our robust CRISPR editing platform will help simplify genetic modifications in  
59 this organism.

60

## 61 **Introduction**

62 *Enterococcus faecalis* is a Gram-positive opportunistic pathogen that is among the leading causes  
63 of hospital-acquired infections (1). *E. faecalis* is a natural colonizer of the human gastrointestinal  
64 tract, and frequent antibiotic usage promotes proliferation of multidrug-resistant (MDR) strains.  
65 Intestinal overgrowth of MDR strains facilitates entry into the bloodstream, where complications  
66 such as bacteremia and endocarditis can occur (2–4).

67

68 V583, the first reported vancomycin-resistant *E. faecalis* isolate in the United States, was isolated  
69 in 1987 from a bloodstream infection (5, 6). Further genomic characterization of V583 and other  
70 MDR strains led to the identification of several genetic characteristics that distinguished MDR  
71 isolates from commensal ones. Generally, MDR enterococci have larger genomes due to an  
72 expanded collection of mobile genetic elements (MGEs) relative to commensal isolates. V583  
73 possesses three plasmids (pTEF1-3), seven integrated prophages, and other MGEs (7, 8). MDR  
74 *E. faecalis* strains, including V583, also lack Clustered Regularly Interspaced Short Palindromic  
75 Repeats and their associated *cas* genes (CRISPR-*cas*) which act as an adaptive immune system  
76 against bacteriophage and MGEs; genome defense is disadvantageous for horizontal acquisition  
77 of antibiotic resistance genes (9–11). However, commensal *E. faecalis* contain type II CRISPR-  
78 Cas systems, which have been extensively reviewed (12). Briefly, foreign DNA is first incorporated

79 as a spacer in a repeat-spacer array (13). The sequence in foreign DNA that is incorporated into  
80 the CRISPR array is known as the protospacer. The repeat-spacer array is transcribed into the  
81 pre-CRISPR RNA (pre-crRNA) and processed into short spacer-repeat fragments forming mature  
82 crRNAs. A trans-encoded crRNA (tracrRNA) base-pairs to the repeat region of the processed  
83 crRNA, and this dual-RNA complex associates with the Cas9 endonuclease (14). The Cas9-dual  
84 RNA complex surveys the genome for protospacer-adjacent motifs (PAMs) and, upon  
85 encountering a PAM that is immediately adjacent to the protospacer, cleaves the target DNA on  
86 both strands (15, 16). CRISPR systems protect bacteria against phage and other MGEs. MDR  
87 enterococci, which have arisen due to their propensity for acquiring antibiotic resistance genes,  
88 lack complete CRISPR systems (10). All *E. faecalis*, however, possess an orphan CRISPR locus,  
89 known as CRISPR2, that lacks *cas* genes (17). CRISPR1 and CRISPR3 are the functional  
90 CRISPR loci in *E. faecalis*, with a complete collection of type II *cas* genes upstream of the repeat-  
91 spacer array (18). Our previous work showed that integrating CRISPR1-*cas9* into V583,  
92 generating strain V649, restores the interference capability of CRISPR2 (19).

93  
94 CRISPR-Cas has widely been used as a genome editing tool (20–24). CRISPR-assisted genome  
95 editing relies on the premise that targeting the chromosome, thereby inducing double-stranded  
96 DNA breaks (DSBs), is lethal (25). In our previous work, we described the perplexing ability for  
97 functional CRISPR-Cas and its targets to temporarily coexist in *E. faecalis* cells without  
98 compensatory mutations (19, 26). Rather than initially rejecting a CRISPR target, some *E. faecalis*  
99 cells transiently maintain it but at a fitness cost. In the absence of selection, the CRISPR target is  
100 lost over time, while in the presence of selection, compensatory mutations (such as spacer loss  
101 or *cas9* inactivation) accumulate over time (19, 26). In this study, we generate a series of  
102 conjugative CRISPR-containing vectors that target the chromosome, and show that *E. faecalis*  
103 can apparently survive simultaneous CRISPR-Cas9 targeting at multiple chromosomal locations.  
104 We show that chromosomal CRISPR targeting (also referred to as self-targeting) induces a

105 transcriptional response distinct from the response to levofloxacin (LVX), a clinically relevant  
106 fluoroquinolone antibiotic. Robust induction of the SOS response genes with LVX treatment, and  
107 the concomitant lack of induction of these genes by CRISPR targeting, led us to conclude that  
108 CRISPR self-targeting does not induce an SOS response in *E. faecalis*. However, CRISPR self-  
109 targeting induced all seven integrated prophages in V583. Finally, we demonstrate that increased  
110 expression of *cas9* leads to CRISPR lethality and contributes to bacteriophage resistance. We  
111 utilize this knowledge to develop a robust CRISPR genome editing platform for *E. faecalis*. These  
112 findings, coupled with our previous results, reveal a mechanism used by a bacterial pathogen to  
113 overcome the limitations of possessing a genome defense system while preserving population-  
114 level protection against foreign DNA.

115

## 116 **Results**

117

### 118 **CRISPR self-targeting is not lethal in *E. faecalis***

119 We previously reported the ability of *E. faecalis* to transiently maintain CRISPR targets (19). It  
120 has also been postulated that CRISPR targets can be temporarily maintained through plasmid  
121 replication that proceeds faster than CRISPR targeting (27). To account for this possibility, the  
122 experiments in this study utilize vectors that direct Cas9 to target the chromosome; this ensures  
123 that CRISPR-Cas complexes would not need to compete with plasmid replication. To generate a  
124 vector for facile generation of chromosome-targeting constructs, we modified a previously  
125 developed plasmid bearing a synthetic CRISPR that targeted *ermB* (19). We removed the first  
126 repeat upstream of the *ermB* spacer and introduced the promoter for pPD1 *bacA* ( $P_{bacA}$ ), which is  
127 strongly constitutive (28). Subsequently, we introduced *pheS\** to allow for counterselection on  
128 *para*-chloro-phenylalanine (*p*-Cl-Phe) (29). The resulting plasmid was designated pGR-*ermB*  
129 (GenBank Accession: MF948287), which has advantages over its parent plasmid. In addition to  
130 counterselection, removal of the first repeat reduces the probability of spacer deletion while also

131 allowing the spacer to be easily altered through PCR-directed mutagenesis (19). We  
132 subsequently modified the spacer to target different regions of the chromosome of *E. faecalis*  
133 V649 (V583 + *cas9*) (19). We assumed that the number of instances a protospacer target was  
134 present in the genome was proportional to the number of DSBs that would be caused via CRISPR  
135 self-targeting. We constructed four derivatives of pGR-*ermB* that were predicted to generate one  
136 DSB (targeting *vanB*, a gene for vancomycin resistance) or up to ten DSBs (targeting the IS256  
137 transposase). A control predicted to generate no DSBs (pGR-*tetM*, targets tetracycline resistance  
138 gene *tetM*, which is not present in V583) was also constructed. Consistent with our previous  
139 observations of CRISPR escape (19, 26), a large number of transconjugants arose despite  
140 chromosomal CRISPR targeting, and no change in conjugation frequency (CF) was observed  
141 between pGR-*vanB* (1 DSB) and pGR-IS256 (10 DSBs) (Figure 1a). This suggested that total  
142 CRISPR lethality could not be achieved even with constructs that theoretically cleaved the  
143 genome in 10 distinct locations, in contrast to previous investigations of CRISPR self-targeting in  
144 other species (25, 30). This result was also observed in M236, an engineered derivative of Merz96  
145 that encodes *cas9* (Figure S1a), and OG1RF, which natively encodes the entire CRISPR1-Cas  
146 system (described later), demonstrating that this phenotype is not strain-specific.

147  
148 Transconjugants of V649 pGR-IS256 were subsequently examined for phenotypic characteristics  
149 of this apparent non-lethal CRISPR self-targeting. Transconjugants that maintained CRISPR self-  
150 targeting constructs displayed slower colony growth relative to control constructs on media with  
151 vancomycin (for selection of V649) and chloramphenicol (for selection of pGR-IS256) (Figure S2).  
152 Furthermore, V649 pGR-IS256 transconjugants possessed an extended lag phase in  
153 chloramphenicol broth relative to controls and were two-fold more sensitive to LVX and  
154 ciprofloxacin (Figure 1b-c, Table S1). A growth defect was also observed in M236 pGR-*vanB*  
155 transconjugants (Figure S1b-c). These findings demonstrate that CRISPR self-targeting  
156 constructs confer deleterious but not lethal fitness effects on *E. faecalis*. We previously

157 demonstrated that these phenotypes are associated with the transient maintenance of CRISPR  
158 conflicts without mutation of the CRISPR machinery in *E. faecalis* (19, 26).

159

### 160 **Transcriptional responses to CRISPR- and fluoroquinolone-induced damage**

161 It is possible that CRISPR-Cas self-targeting in *E. faecalis* induces a robust SOS response, which  
162 has been previously observed in *E. coli* (31). To assess this hypothesis, we performed RNA  
163 sequencing to examine changes in gene expression due to CRISPR and LVX-induced damage.  
164 To assess CRISPR damage, V649 pGR-*tetM* (control) and V649 pGR-IS256 (test)  
165 transconjugants from vancomycin/chloramphenicol selection were pooled and RNA harvested.  
166 To assess LVX-induced damage, RNA was harvested from cultures prior to and two hours after  
167 LVX administration at the minimum inhibitory concentration.

168

169 After statistical filtering, 999 genes in V649 were significantly differentially expressed by either  
170 LVX or CRISPR self-targeting (Dataset S1). 227 genes were significantly up-regulated during  
171 CRISPR self-targeting and 626 were significantly up-regulated by LVX, with 162 genes up-  
172 regulated in both conditions. Therefore, 71.4% of genes up-regulated during CRISPR self-  
173 targeting were also up-regulated by LVX, but only 25.9% of genes up-regulated by LVX were also  
174 up-regulated by CRISPR (Figure S3). Prophage genes were up-regulated by both CRISPR and  
175 LVX (Figure 2). 70% of the significantly up-regulated genes by CRISPR self-targeting alone were  
176 located in prophage elements. Increases in circular Phage01 DNA and infectious phage particles  
177 were detected in LVX and CRISPR treatments (Figure S4). This correlates well with observations  
178 of prophage induction upon ciprofloxacin exposure (32). Importantly, induction of the SOS  
179 response, including *recA*, *dinP*, and EF1080 (predicted *umuC*), was observed with LVX, but not  
180 by CRISPR self-targeting (Dataset S1). Furthermore, various regions of the genome were  
181 regulated discordantly between our two experimental conditions. LVX treatment up-regulated  
182 genes on two integrated plasmids, but CRISPR did not. Interestingly, a cluster of genes in the

183 vancomycin resistance transposon were up-regulated by CRISPR but not differentially regulated  
184 by LVX (Figure 2). Collectively, these data demonstrate that *E. faecalis* responds to CRISPR self-  
185 targeting in a manner distinct from a fluoroquinolone-induced SOS response. Taken together with  
186 our previous findings, we directly demonstrate a unique, semi-lethal phenotype associated with  
187 CRISPR targeting in *E. faecalis*, characterized by prophage induction but no canonical DNA  
188 damage response. We hereafter refer to this transient maintenance of CRISPR targets and the  
189 corresponding phenotypes as “CRISPR tolerance”.

190

### 191 **Genetic basis for CRISPR tolerance**

192 We hypothesized that increasing the abundance of certain components of the CRISPR machinery  
193 would potentiate CRISPR chromosome targeting and lead to lethality. We introduced  $P_{\text{bacA}}$   
194 upstream of *cas9* and examined CFs of CRISPR-targeted plasmids. 27-fold up-regulation of *cas9*  
195 was verified with RT-qPCR (Figure S5). We previously showed that pKHS67, targeted by spacer  
196 67 on the V649 CRISPR2 locus, possesses markedly reduced CFs relative to pKH12, which lacks  
197 a protospacer target (19). When *cas9* expression is increased (strain V117; V583  $P_{\text{bacA}}\text{-cas9}$ ), a  
198 significantly greater reduction in CF is observed, and pKHS67 transconjugants fall near or below  
199 levels of detection (Figure 3A). Similarly, we observe very few V117 transconjugants that arise  
200 from chromosomal targeting with pGR-*vanB* (Figure 3B). We then hypothesized that the few V117  
201 transconjugants that accepted CRISPR targets were mutants with inactivated CRISPR-Cas. To  
202 investigate this, we assessed plasmid maintenance in the absence of selection. Our previous data  
203 showed that CRISPR-dependent plasmid loss in the absence of selection is one of the  
204 phenotypes of CRISPR tolerance (19, 26). Expectedly, V649 pGR-IS256 transconjugants  
205 demonstrate marked plasmid loss after two days of passaging without selection, characteristic of  
206 the CRISPR tolerance phenotype and consistent with pGR-IS256 conferring a fitness defect to  
207 host cells (Figure 3C). However, V117 pGR-IS256 transconjugants on average show no  
208 significant plasmid loss, indicating that these are true CRISPR mutants (Figure 3C). We verified



209 that these observations extend to *E. faecalis* strains natively encoding *cas9* by investigating  
210 OG1RF, which natively possesses the functionally linked CRISPR1-Cas and CRISPR2 loci.  
211 Consistent with results obtained in V649 and M236, we observed a 2-log reduction in CF with  
212 pKHS5, which is targeted by S5 on the OG1RF CRISPR2 locus, relative to the control. We then  
213 inserted  $P_{\text{bacA}}\text{-cas9}$  into OG1RF, creating strain OG117. We observed significant 5-log reductions  
214 in CFs for pKHS5 relative to pKH12 in OG117. CF of a chromosome-targeting construct, pCE-  
215 *pstSCAB* (described later) was similarly reduced in OG117 (Figure 3D). These results collectively  
216 demonstrate that increased *cas9* expression overcomes CRISPR tolerance and results in  
217 CRISPR lethality, and implicate low *cas9* expression as the genetic basis for CRISPR tolerance.

218

219 We investigated whether *cas9* expression contributed to phage resistance, since one of the most  
220 well-characterized functions of CRISPR-Cas is anti-phage defense (11). We designed pGR-  
221 NPV1, which targets  $\Phi$ NPV-1, a phage that infects OG1RF (33). We exposed cultures of OG1RF  
222 and OG117 containing either pGR-*tetM* (control) or pGR-NPV1 to  $\Phi$ NPV1. OG1RF was sensitive  
223 to  $\Phi$ NPV-1 even when possessing pGR-NPV1. However, OG117 was resistant to  $\Phi$ NPV-1 when  
224 possessing pGR-NPV1 but not pGR-*tetM* (Figure 4). These results demonstrate that native *cas9*  
225 expression under routine laboratory conditions is not sufficient to confer defense against phage.

226

### 227 **CRISPR genome editing in *E. faecalis***

228 Knowing that *cas9* overexpression leads to lethality of CRISPR self-targeting, we sought to  
229 develop an efficient CRISPR editing scheme for *E. faecalis*, since none had been reported. We  
230 modified pGR-*vanB* to encode a homologous recombination template which conferred a 100 bp  
231 deletion of *vanB* (Figure S6a). Successful edits would abolish vancomycin resistance, and  
232 therefore allowed us to utilize a rapid screen. The new plasmid, designated pCE-*vanB*, was  
233 conjugated into V649 (V583 + *cas9*) and V117 (V583 +  $P_{\text{bacA}}\text{-cas9}$ ); transconjugants were  
234 selected on erythromycin (for V649 or V117 selection) and chloramphenicol (for pCE-*vanB*

235 selection). After two days, V117 transconjugant colonies appeared at low frequencies.  
236 Interestingly, two colony morphologies were observed for V649 transconjugants; some were large  
237 and appeared after two days, but most were slower-growing and apparent after three days. We  
238 distinguished these phenotypes as “early” (the larger colonies) and “late” (the smaller colonies).  
239 Transconjugants from all three groups (V117, V649 early, and V649 late) were restreaked on  
240 chloramphenicol agar and then screened for vancomycin sensitivity. Remarkably, 83% of V117  
241 transconjugants were vancomycin-sensitive. 50% of the early V649 transconjugants and 22% of  
242 the V649 late transconjugants were vancomycin-sensitive (Table 1). The restreak on  
243 chloramphenicol was essential for CRISPR editing of *vanB*, as V117 pCE-*vanB* transconjugant  
244 colonies on the initial erythromycin/chloramphenicol selection still possessed some cells that were  
245 vancomycin-resistant (Figure S6b). Vancomycin-sensitive clones were passaged and plated on  
246 counterselective media to identify clones that lost pCE-*vanB*, and these were screened for the  
247 desired edit by PCR (Figure S6C). All vancomycin-sensitive clones that were PCR-screened  
248 contained a 100 bp deletion of *vanB*. Editing in V649 reveals that homologous recombination can  
249 rescue these cells from the effects of CRISPR tolerance, albeit at markedly lower efficiencies than  
250 when *cas9* is overexpressed (Table 1).

251  
252 To further evaluate CRISPR editing efficiency, we designed a CRISPR editing construct to delete  
253 genes encoding the putative phosphate transporter *pstB2* or the entire operon consisting of *pstS2*,  
254 *pstA*, *pstC*, *pstB2*, and *pstB* (hereafter referred to as *pstSCAB*) (Figure 5a-b). 67% and 56% of  
255 V117 clones screened by PCR had deletions in *pstB* and *pstSCAB*, respectively. Furthermore,  
256 *pstSCAB* deletion by CRISPR editing in was highly efficient in OG117 (OG1RF + P<sub>bacA</sub>-*cas9*) (95%  
257 editing success), demonstrating that CRISPR editing can be achieved in different *E. faecalis*  
258 strains (Figure 5C).

259

260 During these experiments, the conjugation frequency of chromosomal CRISPR targeting  
261 constructs into V117 (V583 + P<sub>bacA</sub>-cas9) was low (only ~100 CFU/mL transconjugants were  
262 obtained in some experiments). We sought a method to increase CF and avoid plating extremely  
263 high cell densities to detect modified clones. The New England Biolabs REBASE (34) predicted  
264 a type IV restriction endonuclease in V583 (EF3217), for which a homolog was biochemically  
265 assessed in *S. aureus* (35). The predicted recognition site (SCNGS) from *S. aureus* corresponded  
266 to known 5-methylcytosine methylation sites in the *E. faecalis* OG1 derivatives OG1RF and  
267 OG1SSp (G<sup>m5</sup>CWGC) (36). Since the donor used for conjugation in our experiments is also  
268 derived from OG1, we hypothesized that deletion of EF3217 in the recipient would increase CF  
269 of CRISPR editing constructs. We therefore generated strain V200, a V117 derivative which lacks  
270 EF3217, using CRISPR editing. CFs of all plasmids, even those targeting the chromosome, were  
271 significantly greater for V200 recipients compared to V117 (Figure S7). We also successfully  
272 performed CRISPR editing in V200 (V583 + P<sub>bacA</sub>-cas9 ΔEF3217), demonstrating that successive  
273 CRISPR edits are possible in our system (Figure 5C, Table 1).

274

### 275 **“Side effects” of lethal chromosome targeting**

276 Since the genomes of *E. faecalis* clinical isolates typically possess multiple repetitive elements,  
277 we sought to assess if CRISPR editing could drive large genome deletions or rearrangements.  
278 We used pGR-ermB, which targets *ermB* on pTEF1; pTEF1 is a 66 kb pheromone-responsive  
279 plasmid conferring erythromycin and gentamicin resistance that naturally occurs in V583 and its  
280 derivatives. Since *ermB* is flanked by two IS1216 elements, we hypothesized that CRISPR  
281 targeting of *ermB* in the absence of an exogenous recombination template could result in  
282 erythromycin-sensitive mutants that had undergone recombination between the repetitive IS1216  
283 sequences. Indeed, multiple erythromycin-sensitive clones were recovered when *ermB* was  
284 targeted in strain V200. Whole genome sequencing was performed on two of these mutants. One  
285 clone (V202) deleted the entire region between the IS1216 transposases, including *ermB*.

286 Remarkably, the other clone (V204) had lost ~75% of pTEF1 (~45 kb deletion). V204 was also  
287 sensitive to gentamicin via deletion of *aac6'-aph2'*. The mechanism for this large deletion was  
288 recombination between IS1216 and IS256 sequences on pTEF1 and pTEF3, which resulted in  
289 deletions in both plasmids (Figure S8). Our findings demonstrate that CRISPR chromosome  
290 targeting can promote larger and unintended recombination events where repetitive DNA is  
291 abundant, in agreement with previous data (37).

292

293 Finally, we investigated potential off-target mutations that arose as a result of CRISPR genome  
294 editing, including whether unintended mutations occurred as a consequence of *cas9*  
295 overexpression. In addition to sequencing the genomes of V202 and V204 as described above,  
296 we sequenced V117 pCE-*vanB* and V200 (see Figure S8 for a diagram of strain derivations).  
297 These strains collectively represent three independent CRISPR editing events. V200 (V583 +  
298 P<sub>bacA</sub>-*cas9* ΔEF3217) and V204 (V583 + P<sub>bacA</sub>-*cas9* ΔEF3217, *erm*<sup>S</sup>, *gent*<sup>S</sup>) were identical (except  
299 for the aforementioned recombination events), while V117 (V583 + P<sub>bacA</sub>-*cas9*) and V202 (V583  
300 + P<sub>bacA</sub>-*cas9* ΔEF3217, *erm*<sup>S</sup>) differed from V200 by two and one single nucleotide  
301 polymorphisms, respectively (Figure S8). The low frequency of genetic variations between the  
302 four clones confirms the highly specific nature of CRISPR genome editing in our system. Taken  
303 together, we validate CRISPR editing as a highly efficacious platform for genetic manipulation in  
304 *E. faecalis*.

305

## 306 Discussion

307 In this study, we investigated the intrinsic non-lethality of chromosomal targeting by the native *E.*  
308 *faecalis* CRISPR1-*cas9*. We show that maintenance of chromosomal targeting constructs results  
309 in the induction of prophages, but no canonical SOS response. Furthermore, when *cas9* is  
310 overexpressed, a highly significant reduction in the number of transconjugants that accept  
311 CRISPR targeting constructs is observed. These transconjugants appear to be phenotypic

312 CRISPR mutants. Using this knowledge, we subsequently developed a rapid and robust CRISPR  
313 genome editing platform in *E. faecalis*.

314

315 Although we were able to map the transcriptomic response to chromosomal CRISPR targeting,  
316 the exact events that occur inside a cell upon CRISPR self-targeting are unclear. We are uncertain  
317 if low expression of *cas9* alone accounts for the ability to survive chromosomal CRISPR targeting.  
318 It is tempting to speculate that *trans* acting elements (anti-CRISPR proteins, regulatory RNAs,  
319 etc.) may regulate the expression or activity of *cas9*. Furthermore, overexpression of *cas9* does  
320 not lead to complete phenotypic lethality in all cases, exemplified by the fact that some individual  
321 transconjugants harboring chromosomal CRISPR targets show modest plasmid loss in the  
322 absence of selection (Figure 3c). Additionally, during CRISPR editing to remove vancomycin  
323 resistance, the initial transconjugant colony still possesses vancomycin-resistant cells (Figure  
324 S6b). Nevertheless, we show that low expression of *cas9* is largely responsible for the ability of  
325 *E. faecalis* to transiently tolerate CRISPR targets, which may be advantageous to allow some *E.*  
326 *faecalis* cells to accept foreign DNA. This phenotype may also protect strains that accidentally  
327 acquire a self-targeting spacer. During preparation of this manuscript, a study by Jones et al.  
328 demonstrated that kinetics of a catalytically inactive Cas9 are particularly slow at low  
329 concentrations (38). The investigators suggest that in order for Cas9 to quickly find its target, both  
330 Cas9 and the crRNA would need to be present at high concentrations. It is therefore possible that  
331 the CRISPR tolerance we observe here and in our previous work is actually the direct phenotype  
332 of slow Cas9 kinetics in nature. Nevertheless, the advantage of CRISPR tolerance in the context  
333 of beneficial MGEs is clear. When CRISPR targets that may be beneficial are encountered by a  
334 population, it is advantageous for a large fraction of that population to be CRISPR tolerant and  
335 “sample” the effect of possessing the MGE. If the MGE is helpful for survival, the cell can still  
336 proliferate; if it is not, the MGE can be removed or MGE-containing cells outcompeted.

337

338 The ability to maximize DNA acquisition appears to come at the cost of compromised  
339 bacteriophage defense. This phenomenon has yet to be observed in other bacteria, and  
340 underscores the puzzlingly low expression of *cas9* in *E. faecalis*. While it is possible that *E.*  
341 *faecalis* has lost CRISPR function in the context of phage defense altogether, we hypothesize  
342 that it is more likely that CRISPR-Cas, specifically *cas9*, is somehow induced under certain  
343 conditions. The extent to which CRISPR tolerance occurs for *E. faecalis* in the gastrointestinal  
344 tract will be the subject of future investigations.

345

## 346 **Materials and Methods**

347 Detailed materials and methods can be found in SI Materials and Methods. Raw reads for RNA  
348 sequencing and whole genome sequencing have been deposited in the Sequence Read Archive  
349 under PRJNA420898.

350

## 351 **Statistics**

352 P-values for conjugation frequencies and CFU measurements were calculated using a one-tailed  
353 Student's t-test from log<sub>10</sub>-transformed values. P-values for RT-qPCR data were calculated using  
354 a one tailed Student's t-test. Geometric means and geometric standard deviations are shown for  
355 all data except those presented in Table 1 (CRISPR editing experiments). \*\*\*P < 0.001, \*\*P <  
356 0.01, \* P < 0.05.

357

358

## 359 **Acknowledgements**

360 This work was supported by NIH R01 AI116610 to K.L.P. We thank Dr. Breck Duerkop and Dr.  
361 Pascale Serror for advice on detecting lytic phage particles.

362

363

364 **References**

365

366 1. **Lebreton F, Willems RJL, Gilmore MS.** 2014. Enterococcus Diversity, Origins in Nature,  
367 and Gut Colonization. *In* Gilmore MS, Clewell DB, Ike Y, Shankar N (ed), *Enterococci:*  
368 *From Commensals to Leading Causes of Drug Resistant Infection*, Boston

369

370 2. **Kristich CJ, Rice LB, Arias CA.** 2014. Enterococcal Infection—Treatment and Antibiotic  
371 Resistance. *In* Gilmore MS, Clewell DB, Ike Y, Shankar N (ed), *Enterococci: From*  
372 *Commensals to Leading Causes of Drug Resistant Infection*, Boston

373

374 3. **Arias CA, Murray BE.** 2012. The rise of the Enterococcus: beyond vancomycin resistance.  
375 *Nat Rev Microbiol* **10**:266–278.

376

377 4. **Centers for Disease Control and Prevention.** 2013. Antibiotic Resistance Threats in the  
378 United States, 2013.

379

380 5. **Paulsen IT, Banerjee L, Myers GSA, Nelson KE, Seshadri R, Read TD, et al.** 2003. Role  
381 of Mobile DNA in the Evolution of Vancomycin-Resistant *Enterococcus faecalis*. *Science*  
382 **299**:2071–2074.

383

384 6. **Sahm DF, Kissinger J, Gilmore MS, Murray PR, Mulder R, Solliday J, Clarke B.** 1989.  
385 *In vitro* susceptibility studies of vancomycin-resistant *Enterococcus faecalis*. *Antimicrob*  
386 *Agents Chemother* **33**:1588–91.

387

388 7. **Bourgogne A, Garsin DA, Qin X, Singh K V, Sillanpaa J, et al.** 2008. Large scale  
389 variation in *Enterococcus faecalis* illustrated by the genome analysis of strain OG1RF.  
390 *Genome Biol* **9**:R110.

391

392 8. **Palmer KL, Godfrey P, Griggs A, Kos VN, Zucker J, et al.** 2012. Comparative genomics  
393 of enterococci: variation in *Enterococcus faecalis*, clade structure in *E. faecium*, and  
394 defining characteristics of *E. gallinarum* and *E. casseliflavus*. *MBio* **3**:e00318–11.

395

396 9. **Makarova KS, Haft DH, Barrangou R, Brouns SJJ, Charpentier E, et. al.** 2011.  
397 Evolution and classification of the CRISPR-Cas systems. *Nat Rev Microbiol* **9**:467–77.

398

399 10. **Palmer KL, Gilmore MS.** 2010. Multidrug-resistant enterococci lack CRISPR-cas. *MBio*  
400 **1**:e00227–10.

401

402 11. **Barrangou R, Marraffini LA.** 2014. CRISPR-Cas systems: Prokaryotes upgrade to  
403 adaptive immunity. *Mol Cell* **54**:234–44.

404

- 405 12. **Chylinski K, Makarova KS, Charpentier E, Koonin E V.** 2014. Classification and  
406 evolution of type II CRISPR-Cas systems. *Nucleic Acids Res* **42**:6091–6105.  
407
- 408 13. **Amitai G, Sorek R.** 2016. CRISPR–Cas adaptation: insights into the mechanism of action.  
409 *Nat Rev Microbiol* **14**:67–76.  
410
- 411 14. **Deltcheva E, Chylinski K, Sharma CM, Gonzales K, Chao Y, Pirzada ZA, Eckert MR,**  
412 **Vogel J, Charpentier E.** 2011. CRISPR RNA maturation by trans-encoded small RNA and  
413 host factor RNase III. *Nature* **471**:602–7.  
414
- 415 15. **Sternberg SH, Redding S, Jinek M, Greene EC, Doudna JA.** 2014. DNA interrogation  
416 by the CRISPR RNA-guided endonuclease Cas9. *Nature* **507**:62–67.  
417
- 418 16. **Sternberg SH, LaFrance B, Kaplan M, Doudna JA.** 2015. Conformational control of DNA  
419 target cleavage by CRISPR–Cas9. *Nature* **527**:110–113.  
420
- 421 17. **Hullahalli K, Rodrigues M, Schmidt BD, Li X, Bhardwaj P, Palmer KL.** 2015.  
422 Comparative Analysis of the Orphan CRISPR2 Locus in 242 *Enterococcus faecalis* Strains.  
423 *PLoS One* **10**:e0138890.  
424
- 425 18. **Price VJ, Huo W, Sharifi A, Palmer KL.** 2016. CRISPR-Cas and Restriction-Modification  
426 Act Additively against Conjugative Antibiotic Resistance Plasmid Transfer in *Enterococcus*  
427 *faecalis*. *mSphere* **1**:e00064-16  
428
- 429 19. **Hullahalli K, Rodrigues M, Palmer KL.** 2017. Exploiting CRISPR-Cas to manipulate  
430 *Enterococcus faecalis* populations. *Elife* **6**:26664  
431
- 432 20. **Jiang Y, Chen B, Duan C, Sun B, Yang J, Yang S.** 2015. Multigene editing in the  
433 *Escherichia coli* genome via the CRISPR-Cas9 system. *Appl Environ Microbiol* **81**:2506–  
434 14.  
435
- 436 21. **Jiang W, Bikard D, Cox D, Zhang F, Marraffini LA.** 2013. RNA-guided editing of bacterial  
437 genomes using CRISPR-Cas systems. *Nat Biotechnol* **31**:233–239.  
438
- 439 22. **Wasels F, Jean-Marie J, Collas F, López-Contreras AM, Lopes Ferreira N.** 2017. A  
440 two-plasmid inducible CRISPR/Cas9 genome editing tool for *Clostridium acetobutylicum*.  
441 *J Microbiol Methods* **140**:5–11.  
442
- 443 23. **Xu T, Li Y, Shi Z, Hemme CL, Li Y, Zhu Y, Van Nostrand JD, He Z, Zhou J.** 2015.  
444 Efficient Genome Editing in *Clostridium cellulolyticum* via CRISPR-Cas9 Nickase. *Appl*  
445 *Environ Microbiol* **81**:4423–31.  
446



- 447 24. **Barrangou R, van Pijkeren J-P.** 2016. Exploiting CRISPR–Cas immune systems for  
448 genome editing in bacteria. *Curr Opin Biotechnol* **37**:61–68.  
449
- 450 25. **Selle K, Barrangou R.** 2015. Harnessing CRISPR–Cas systems for bacterial genome  
451 editing. *Trends Microbiol* **23**:225–232.  
452
- 453 26. **Huo W, Price VJ, Sharifi A, Zhang MQ, Palmer KL.** 2017. Evolutionary outcomes of  
454 plasmid-CRISPR conflicts in an opportunistic pathogen. *bioRxiv* 220467.  
455
- 456 27. **Høyland-Kroghsbo NM, Paczkowski J, Mukherjee S, Broniewski J, Westra E, Bondy-  
457 Denomy J, Bassler BL.** 2017. Quorum sensing controls the *Pseudomonas aeruginosa*  
458 CRISPR-Cas adaptive immune system. *Proc Natl Acad Sci U S A* **114**:131–135.  
459
- 460 28. **Fujimoto S, Ike Y.** 2001. pAM401-based shuttle vectors that enable overexpression of  
461 promoterless genes and one-step purification of tag fusion proteins directly from  
462 *Enterococcus faecalis*. *Appl Environ Microbiol* **67**:1262–7.  
463
- 464 29. **Kristich CJ, Chandler JR, Dunny GM.** 2007. Development of a host-genotype-  
465 independent counterselectable marker and a high-frequency conjugative delivery system  
466 and their use in genetic analysis of *Enterococcus faecalis*. *Plasmid* **57**:131–44.  
467
- 468 30. **Bikard D, Euler CW, Jiang W, Nussenzweig PM, Goldberg GW, Duportet X, Fischetti  
469 VA, Marraffini LA.** 2014. Exploiting CRISPR-Cas nucleases to produce sequence-specific  
470 antimicrobials. *Nat Biotechnol* **32**:1146–1150.  
471
- 472 31. **Cui L, Bikard D.** 2016. Consequences of Cas9 cleavage in the chromosome of *Escherichia*  
473 *coli*. *Nucleic Acids Res* **44**:4243–51.  
474
- 475 32. **Matos RC, Lapaque N, Rigottier-Gois L, Debarbieux L, Meylheuc T, et. al.** 2013.  
476 *Enterococcus faecalis* Prophage Dynamics and Contributions to Pathogenic Traits. *PLoS*  
477 *Genet* **9**:e1003539.  
478
- 479 33. **Teng F, Singh K V, Bourgogne A, Zeng J, Murray BE.** 2009. Further characterization of  
480 the *epa* gene cluster and *Epa* polysaccharides of *Enterococcus faecalis*. *Infect Immun*  
481 **77**:3759–67.  
482
- 483 34. **Roberts RJ, Vincze T, Posfai J, Macelis D.** 2015. REBASE—a database for DNA  
484 restriction and modification: enzymes, genes and genomes. *Nucleic Acids Res* **43**:D298–  
485 D299.  
486
- 487 35. **Xu S-Y, Corvaglia AR, Chan S-H, Zheng Y, Linder P.** 2011. A type IV modification-  
488 dependent restriction enzyme *SauUSI* from *Staphylococcus aureus* subsp. *aureus*

- 489 USA300. *Nucleic Acids Res* **39**:5597–610.  
490
- 491 36. **Huo W, Adams HM, Zhang MQ, Palmer KL.** 2015. Genome Modification in *Enterococcus*  
492 *faecalis* OG1RF Assessed by Bisulfite Sequencing and Single-Molecule Real-Time  
493 Sequencing. *J Bacteriol* **197**:1939–51.  
494
- 495 37. **Selle K, Klaenhammer TR, Barrangou R.** 2015. CRISPR-based screening of genomic  
496 island excision events in bacteria. *Proc Natl Acad Sci U S A* **112**:8076–81.  
497
- 498 38. **Jones DL, Leroy P, Unoson C, Fange D, Ćurić V, Lawson MJ, Elf J.** 2017. Kinetics of  
499 dCas9 target search in *Escherichia coli*. *Science* **357**:1420–1424.  
500
- 501 39. **Leenhouts K, Buist G, Bolhuis A, ten Berge A, Kiel J, Mierau I, Dabrowska M, Venema**  
502 **G, Kok J.** 1996. A general system for generating unlabelled gene replacements in bacterial  
503 chromosomes. *Mol Gen Genet* **253**:217–24.  
504
- 505 40. **Thurlow LR, Thomas VC, Hancock LE.** 2009. Capsular polysaccharide production in  
506 *Enterococcus faecalis* and contribution of CpsF to capsule serospecificity. *J Bacteriol*  
507 **191**:6203–10.  
508
- 509 41. **Kristich CJ, Manias DA, Dunny GM.** 2005. Development of a method for markerless  
510 genetic exchange in *Enterococcus faecalis* and its use in construction of a *srtA* mutant.  
511 *Appl Environ Microbiol* **71**:5837–49.  
512
- 513 42. **Duerkop BA, Clements C V, Rollins D, Rodrigues JLM, Hooper L V.** 2012. A composite  
514 bacteriophage alters colonization by an intestinal commensal bacterium. *Proc Natl Acad*  
515 *Sci U S A* **109**:17621–6.

| Strain       | Edit           | Editing Efficiency (%) | Type      | Size of edit (kb) |
|--------------|----------------|------------------------|-----------|-------------------|
| V649 "early" | <i>vanB</i>    | 50 ± 34.8              | Deletion  | 0.1               |
| V649 "late"  | <i>vanB</i>    | 21.8 ± 18.3            | Deletion  | 0.1               |
| V117         | <i>vanB</i>    | 83.3 ± 13.6            | Deletion  | 0.1               |
|              | <i>pstB</i>    | 66.7 ± 16.7            | Deletion  | 0.8               |
|              | <i>pstSCAB</i> | 55.6 ± 9.6             | Deletion  | 4.3               |
|              | EF3217         | -                      | Deletion  | 2.9               |
| V200         | <i>pstSCAB</i> | 77.8 ± 9.6             | Deletion  | 4.3               |
|              | <i>tetM</i>    | 38.8 ± 9.6             | Insertion | 2.5               |
| OG117        | <i>pstSCAB</i> | 94.4 ± 9.6             | Deletion  | 4.3               |

**Table 1. CRISPR editing experiments performed in this study.** Each experiment was performed in at least biological triplicate; mean and standard deviation is shown as indicated. Six clones were screened in each replicate. The exception was the deletion of EF3217, which was performed solely to generate the mutant. CRISPR editing of *vanB* was screened phenotypically, while all other experiments were screened by PCR. Editing efficiency was calculated as the number of successful edits as a percentage of the total number of clones screened. *tetM* was inserted between EF1866 and EF1867.

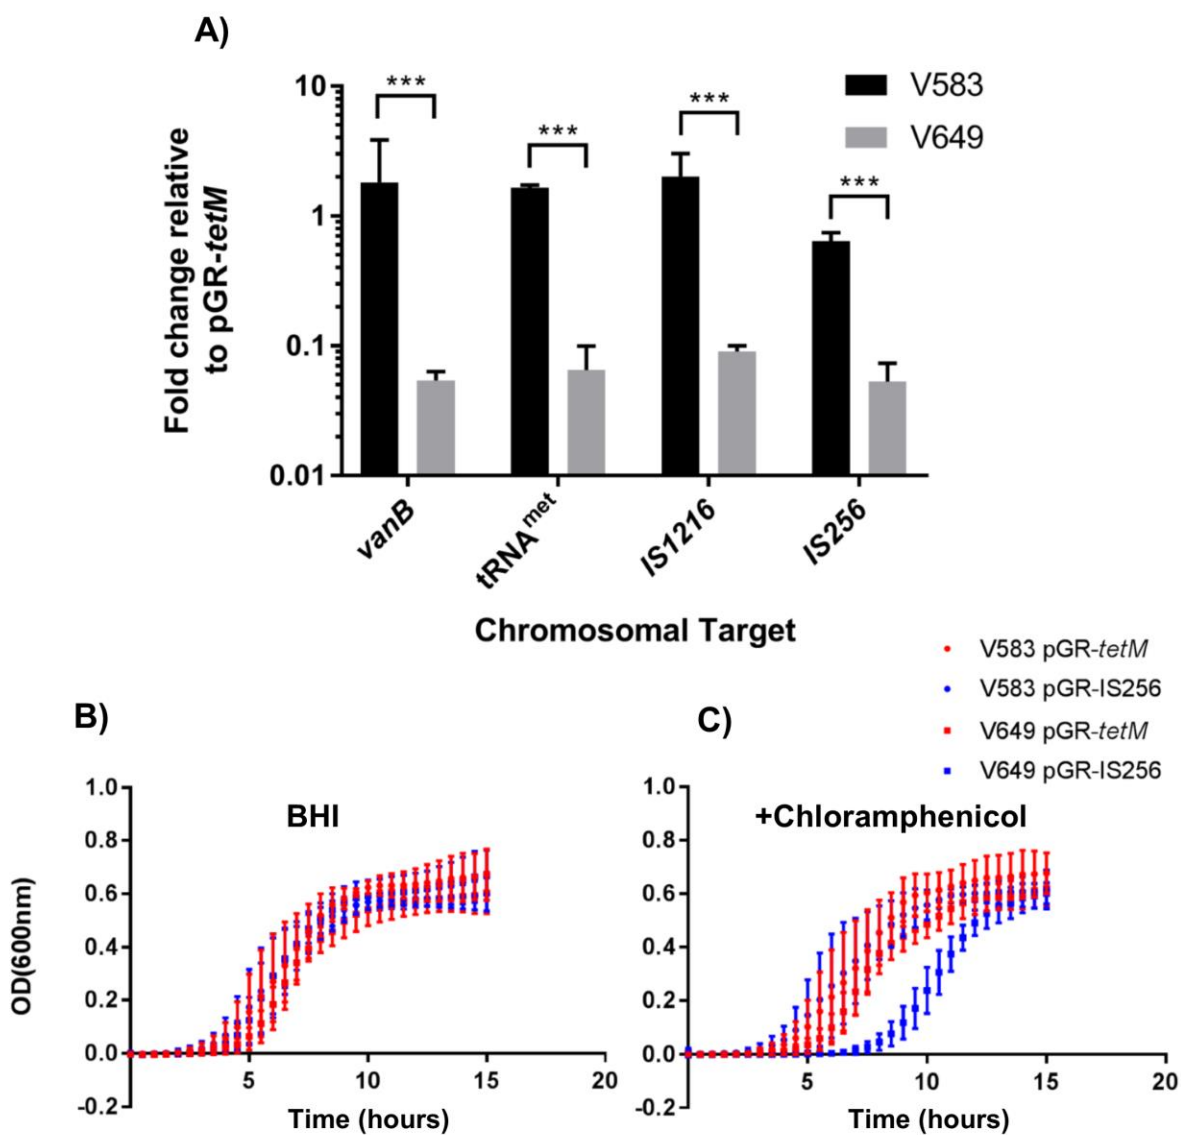

**Figure 1. CRISPR tolerance protects against self-targeting.** A) Conjugation frequency relative to pGR-*tetM* is shown for 1 DSB (*vanB*), 5 DSBs (methionyl tRNA), 9 DSBs (IS 1216) and 10 DSBs (IS256) as transconjugants per donor (n=3). B) OD<sub>600nm</sub> is shown for V649 pGR-*tetM* (control) and V649 pGR-IS256 (10 predicted cuts) transconjugants grown in BHI or C) BHI supplemented with chloramphenicol (n=2). \*\*\*P<0.001

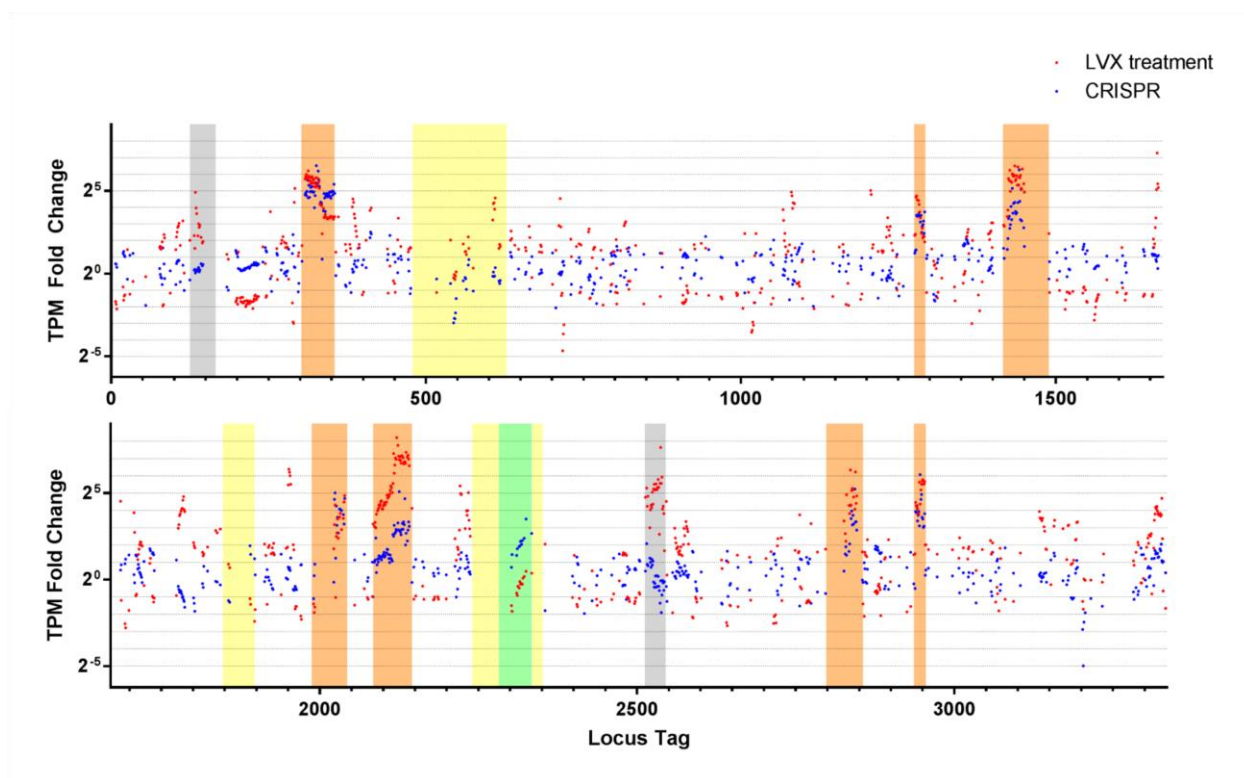

**Figure 2. Transcriptomic responses to CRISPR-Cas9 self-targeting and LVX treatment.** Significant changes in gene expression across the V649 chromosome are plotted as the fold change of transcripts per million (TPM) values for LVX (red dots) and CRISPR self-targeting (blue dots). Yellow, putative islands; grey, integrated plasmids; orange, prophages; green, vancomycin resistance transposon. See Dataset S1 for full dataset.

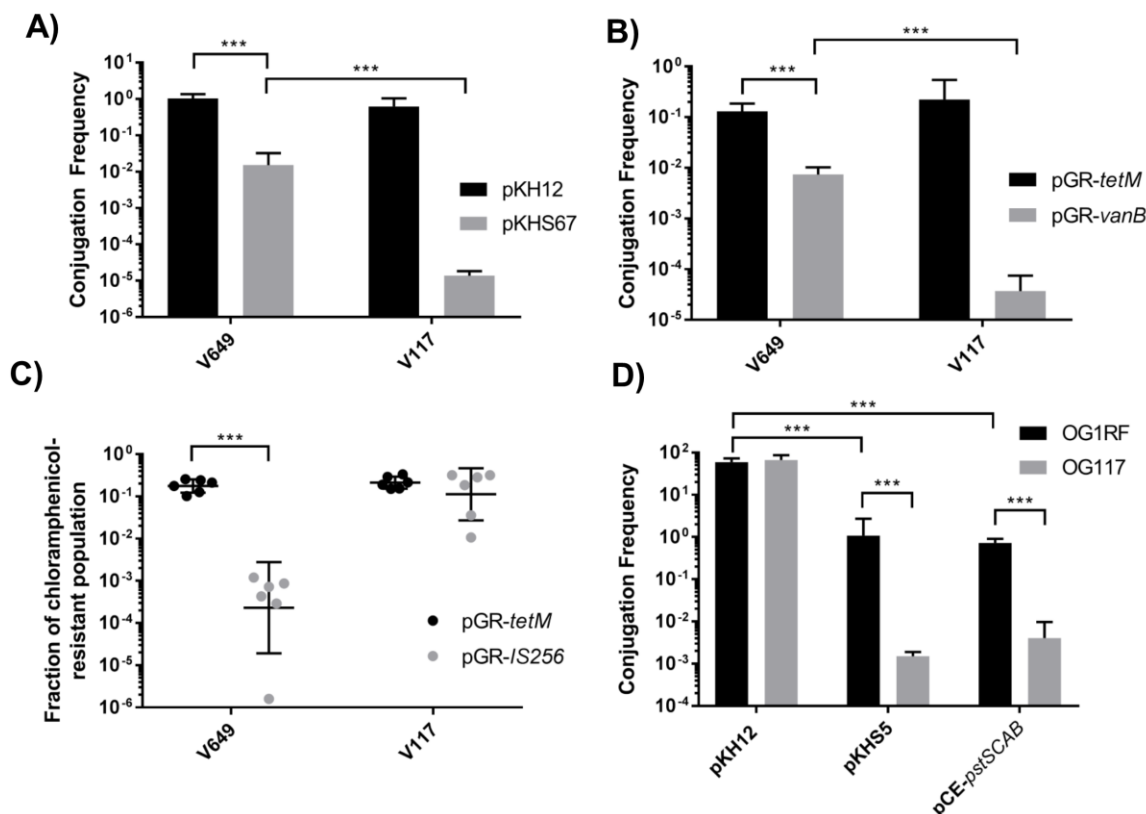

**Figure 3. Low *cas9* expression is the genetic basis for CRISPR tolerance.** A) Conjugation frequencies of pKH12 (control) and pKHS67 (protospacer target for S67 on the V583 chromosome) are shown into V649 (V583 + *cas9*) and V117 (V583 + P<sub>bacA</sub>-*cas9*) as transconjugants per donor (n=3). B) Conjugation frequency of control (pGR-*tetM*) or chromosomal CRISPR targeting plasmids (1 cut, pGR-*vanB*) is shown as transconjugants per donor (n=3). C) Plasmid retention, as fraction of chloramphenicol resistant population, is shown for pGR-*tetM* and pGR-IS256 in V649 (V583 + *cas9*) and V117 (V583 + P<sub>bacA</sub>-*cas9*) populations passaged for two days in the absence of chloramphenicol selection. D) Conjugation frequencies of pKH12 (control), pKHS5 (targeted by CRISPR2 of OG1RF) and pCE-*pstSCAB* (targets chromosome for CRISPR editing) are shown for OG1RF and OG117 (OG1RF + P<sub>bacA</sub>-*cas9*) recipients as transconjugants per donor (n=3). The limit of detection was 1000 CFU/ml for all panels. \*\*\*P<0.001

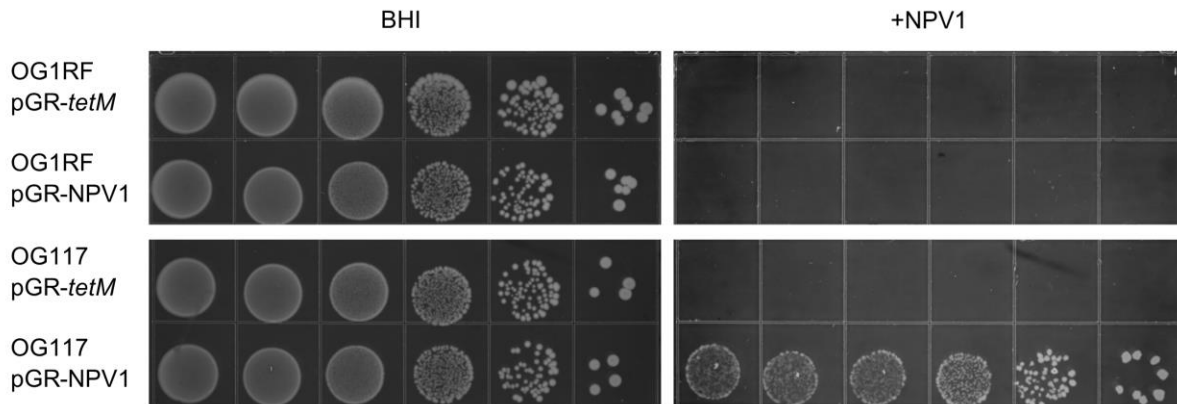

**Figure 4. Native *cas9* expression does not protect against bacteriophage.** OG1RF and OG117 (OG1RF +  $P_{\text{bacA-cas9}}$ ) containing either pGR-*tetM* (control) or pGR-NPV1 (targets  $\Phi$ NPV1) were spotted on BHI or BHI with  $\Phi$ NPV1 in a soft agar overlay. Chloramphenicol was included to promote plasmid maintenance. 10-fold dilutions are shown. Results were consistent across 3 biological replicates.

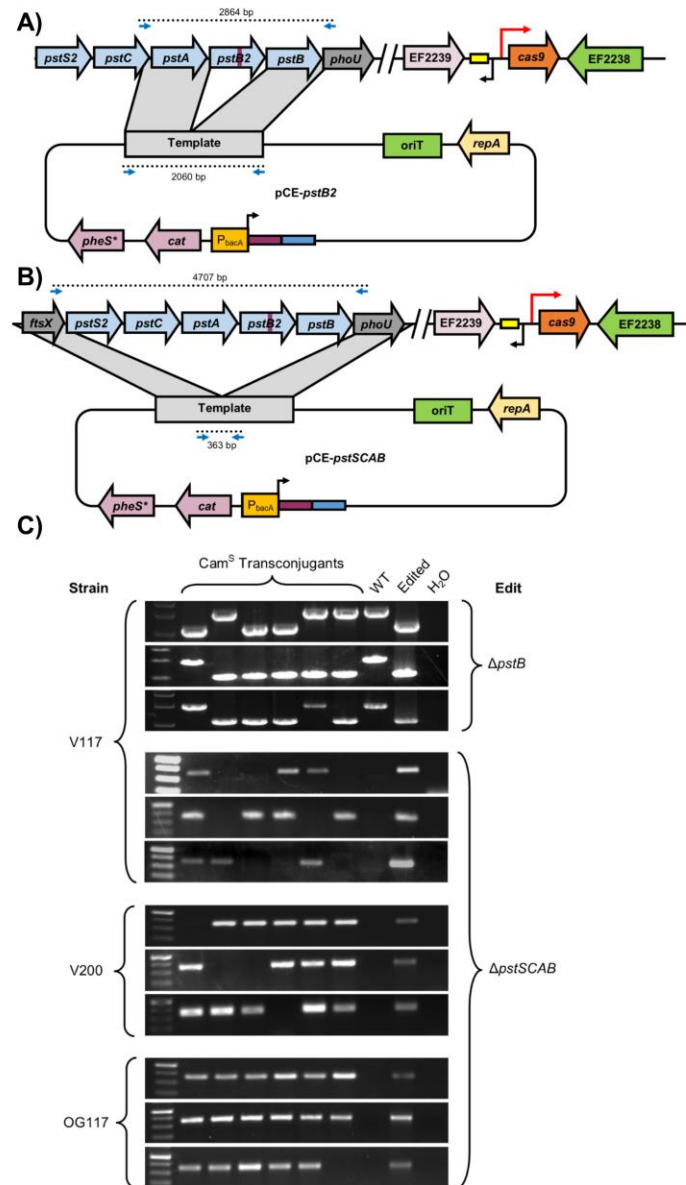

**Figure 5. CRISPR editing in *E. faecalis*.** A) Plasmids, editing schematic, and screening primers are shown for deletions of *pstB* and *pstSCAB*. The purple rectangle represents the spacer and the blue rectangle represents the repeat. B) Editing experiments are shown for individual experiments (three per group) in V117 (V583 +  $P_{\text{bacA}}$ -*cas9*), V200 (V583 +  $P_{\text{bacA}}$ -*cas9*  $\Delta$ EF3217), and OG117 (OG1RF +  $P_{\text{bacA}}$ -*cas9*) with indicated edits. Frequencies are shown in Table 1. Successful edits and appropriate negative controls are shown as indicated. All clones were verified to be chloramphenicol sensitive, indicative of plasmid loss.



516  
517  
518  
519  
520  
521  
522  
523  
524  
525  
526  
527  
528  
529  
530  
531  
532  
533  
534  
535  
536  
537  
538  
539  
540  
541

## Supporting Information

### SI Material and Methods

#### Bacterial strains, growth conditions, and routine molecular biology procedures

*Enterococcus faecalis* was routinely cultured at 37°C in Brain Heart Infusion (BHI) without agitation; *Escherichia coli* was routinely cultured at 37°C in Lysogeny Broth with agitation at 220 rpm. Routine PCR was performed with Taq DNA polymerase, and PCR for cloning purposes was performed with Q5 DNA polymerase (New England Biolabs). T4 Polynucleotide Kinase (New England Biolabs) was used for routine phosphorylation. PCR products were purified with the PureLink PCR Purification Kit (Invitrogen). Plasmids were purified using the GeneJet Plasmid Purification Kit (Fisher). Primers were synthesized by Sigma-Aldrich. Routine DNA sequencing was performed at the Massachusetts General Hospital DNA Core facility. *E. coli* EC1000 was used for routine plasmid propagation (39). *E. faecalis* and *E. coli* competent cells were prepared as described previously (19). Genomic DNA was extracted using the MO BIO Microbial DNA Isolation Kit (Qiagen). Antibiotics were used in the following concentrations: chloramphenicol, 15 µg/ml; streptomycin, 500 µg/ml; spectinomycin, 500 µg/ml; vancomycin (van), 10 µg/ml; erythromycin (erm), 50 µg/ml; rifampicin, 50 µg/ml; fusidic acid, 25 µg/ml; tetracycline, 10 µg/ml; gentamicin (gent), 300 µg/ml. A full list of primers can be found in Table S2.

#### Strain and plasmid construction

A schematic of the plasmid construction used in this study is shown in Figure S9. All strains and plasmids used in this study are shown in Table S3. CRISPR edited strains are shown in Table 1. All CRISPR editing plasmids can be derived in a single step from pGR-*ermB* (accession number: MF948287). The derivation of pGR-*ermB* is described below.

542 To generate chromosomal targeting constructs, pCR2-*ermB* was linearized to remove 160 bp  
543 upstream of the *ermB* spacer and simultaneously introduce the promoter of *bacA* from pPD1,  
544 which is constitutive ( $P_{bacA}$ ) (19, 28). This procedure also removed the upstream repeat. The linear  
545 product was phosphorylated and self-ligated to generate an intermediate plasmid referred to as  
546 pSR-*ermB*. This plasmid was once again linearized around *cat* and a fragment containing *cat* and  
547 *pheS\** from pLT06 was blunt-end ligated (40). The original *cat* was deleted to simplify the cloning  
548 procedure. The final plasmid was designated pGR-*ermB*, and was fully sequenced (accession  
549 number: MF948287).

550

551 To modify the spacer, pGR-*ermB* was linearized at  $P_{bacA}$  and the downstream repeat; primers  
552 contained the entirety of the spacer sequence to be inserted. The exception was pGR-IS256,  
553 which was generated without ligation by taking advantage of the ability of *E. coli* EC1000 to  
554 recombine linear DNA (i.e., linear DNA was recombined *in vivo*). All pGR derivatives were  
555 sequence-verified to ensure spacer integrity prior to introduction into C173 for conjugation.  
556 Homologous recombination templates were introduced using the NEB HiFi DNA Assembly Master  
557 Mix (New England Biolabs). For simplicity, the spacer was included as overhangs during Gibson  
558 assembly, and therefore a plasmid containing two fragments for homologous recombination and  
559 the appropriate spacer could be generated in a single step. The same linearization-  
560 phosphorylation-ligation procedure was used to modify the plasmid to insert  $P_{bacA}$  upstream of  
561 *cas9*. Knock-in protocols were performed essentially as previously described (41). A streamlined  
562 protocol for CRISPR-Cas9 genome editing in *E. faecalis* using our system is outlined in Figure  
563 S10 and the primer schematic for generating CRISPR editing plasmids is shown in Figure S9.

564

565 For CRISPR editing, the appropriate plasmid was first transformed into *E. faecalis* C173 or  
566 CK111SSp(pCF10-101). Conjugation was then performed into the desired recipient strain, and  
567 transconjugants were selected on agar media containing chloramphenicol and appropriate

568 antibiotics for recipient strain selection. Transconjugant colonies were re-struck for isolation on  
569 agar media containing chloramphenicol, and single colonies were inoculated into 1-5 mL of BHI  
570 broth lacking antibiotics and incubated at 37°C until turbid. Cultures were then struck on MM9YEG  
571 + *para*-chloro-phenylalanine (p-Cl-Phe) to counterselect for the plasmid backbone. By this point,  
572 the recipient strain will have received the CRISPR editing plasmid, recombined with the editing  
573 template, and then lost the backbone plasmid. In total, this procedure can take as little as two  
574 days once transconjugants are obtained. We observed that an additional passage in MM9YEG +  
575 p-Cl-Phe was helpful for eliminating residual chloramphenicol resistance, since the  
576 counterselection is imperfect. This extra passage was utilized whenever frequencies needed to  
577 be determined and there was no marker to phenotypically screen for, since preliminary  
578 experiments occasionally yielded some chloramphenicol-resistant clones which interfered with an  
579 accurate assessment of successful editing rates. Once presumptive CRISPR-edited mutants  
580 were obtained, colony PCR to confirm the desired edit was performed in all cases except for  
581 deletion of *pstB*; the larger amplicon required that genomic DNA be extracted.

582

### 583 **Conjugation assays**

584 Conjugation assays were performed essentially as described (19). C173 was used as the donor  
585 in all experiments, except for experiments using CRISPR editing to delete *vanB*. For deletion of  
586 *vanB*, the erythromycin-sensitive strain CK111SSp(pCF10-101) was used as donor, since  
587 transconjugant selection during this experiment required erythromycin instead of vancomycin,  
588 and C173 is erythromycin-resistant.

589

### 590 **Transcriptomics Analysis**

591 To assess the transcriptional response to CRISPR self-targeting, transconjugants of V649 pGR-  
592 *tetM* (control) and V649 pGR-IS256 (test) selected on vancomycin and chloramphenicol were  
593 incubated on agar media for 2 days. Cells were scraped from plates, resuspended in RNA-Bee

594 (Tel-Test), and lysed by bead-beating in lysis matrix B (MP Biomedicals). After RNA-Bee  
595 extraction, the aqueous layer was subject to ethanol precipitation. The RNA was treated with  
596 DNase (Roche) and concentrated using the GeneJet RNA Cleanup and Concentration Kit  
597 (Fisher). For assessment of the transcriptional response to levofloxacin (LVX)-induced stress,  
598 cells were treated essentially as previously described (19). Briefly, overnight cultures of V649  
599 were diluted in fresh medium and grown to  $OD_{600nm} = 0.3$ , at which point cultures were split. Some  
600 cells were harvested for control transcriptomic analysis, and LVX was added to remaining cells at  
601 a concentration of 1  $\mu\text{g/ml}$ . After two hours of incubation with LVX, the remaining cells were  
602 harvested. RNA was isolated and treated with DNase as described above. Three biological  
603 replicates were performed with both experimental conditions.

604

605 RNA-Seq analysis was performed at MR DNA (Molecular Research LP). The concentration of  
606 total RNA was determined using the Qubit® RNA Assay Kit (Life Technologies). Baseline-  
607 ZERO™ DNase (Epicentre) was used to remove DNA contamination, and the RNA was purified  
608 using the RNA Clean & Concentrator-5 columns (Zymo Research). Subsequently, rRNA was  
609 removed by using the Ribo-Zero™ Gold rRNA Removal Kit (Epidemiology; Illumina) and purified  
610 with the RNA Clean & Concentrator-5 columns (Zymo Research). rRNA depleted samples were  
611 subjected to library preparation using the TruSeq™ RNA LT Sample Preparation Kit (Illumina)  
612 according to the manufacturer's instructions. The libraries were pooled and sequenced paired  
613 end for 300 cycles using the HiSeq 2500 system (Illumina).

614

615 RNA-sequencing data was analyzed using CLC Genomics Workbench. rRNA and tRNA reads  
616 were first removed and the unmapped reads were mapped to the V649 reference genome.  
617 Transcripts per million (TPM) values were used to quantitate expression. False discovery rate  
618 (FDR)-adjusted P value was used to assess significance. Genes were filtered first by removing  
619 those for which both CRISPR self-targeting and LVX treatment yielded FDR-adjusted P-values

620 >0.05. Subsequently, genes for which both LVX and CRISPR self-targeting had fold changes <2  
621 were removed. The remaining list consisted of genes that were significantly up or downregulated  
622 by either LVX or CRISPR self-targeting.

623

624 RT-qPCR to verify increased *cas9* expression was performed as previously described (19). RNA  
625 was harvested from OD<sub>600nm</sub>=0.3 cultures of V649 and V117.

626

### 627 **Phage Resistance Assay**

628 Approximately 10<sup>5</sup>-10<sup>6</sup> PFU/mL of  $\Phi$ NPV-1 was added to 5 mL of M17 + chloramphenicol soft  
629 agar and overlaid on BHI + chloramphenicol agar (33). Overnight cultures of OG1RF and OG117  
630 containing pGR-*tetM* or pGR-NPV1 were spotted on the soft agar containing  $\Phi$ NPV1. pGR-NPV1  
631 targets a predicted phage lysin gene. A simultaneous control lacking soft agar and phage was  
632 included to enumerate total bacterial CFU. Using identical amounts of  $\Phi$ NPV-1 in each  
633 experiment was essential for consistent results.

634

### 635 **Detection of circular Phage01 DNA.**

636 Cultures were treated identically to those prepared for RNA-sequencing. Cells were pelleted and  
637 genomic DNA was extracted using the MO BIO Microbial DNA Isolation Kit (Qiagen) per  
638 manufacturer's instructions. RT-qPCR was performed using the AzuraQuant Green Fast qPCR  
639 Mix Lo Rox (Azura) per the manufacturer's instructions. Similar to a previously reported approach  
640 for circular phage detection (32), circular Phage01 DNA was detected using primers qpp1c For  
641 and qpp1c Rev, which amplify across the junction of the circularized phage.

642

### 643 **Phage lysis assay**

644 Cultures were induced with LVX as described in a previous section. Induced cultures were  
645 pelleted, and the supernatant was filtered using 0.2  $\mu$ m polyethersulfone filters. Similarly,

646 transconjugant colonies of V649 pGR-*tetM* and V649 pGR-IS256 were scraped from agar plates  
647 using 2 mL PBS (identical to protocol used for transcriptomics analysis), pelleted, and the  
648 supernatant filtered. Filtrates were spotted on soft agar containing lawns of *E. faecalis* ATCC  
649 29212, which is susceptible to infection by V583 prophages (42). To prepare the lawns, overnight  
650 cultures of ATCC 29212 were diluted in fresh medium and cultured to  $OD_{600nm}=0.4$ . 10  $\mu$ L culture  
651 was added to 2 mL melted soft agar (BHI broth, 0.2% agarose, 10 mM  $MgSO_4$ ) and the mixture  
652 was poured on a 100 mm diameter standard BHI agar plate (1.5% agar). We observed that  
653 varying the amount of bacteria added and the thickness of the soft agar affected visibility of phage  
654 plaques; the protocol we present here yielded the clearest zones of lysis.

655

### 656 **Genome sequencing**

657 Whole genome sequencing was performed at MR DNA (Molecular Research LP). Briefly, libraries  
658 were prepared using the Nextera DNA Sample preparation kit (Illumina) using 50 ng of total  
659 genomic DNA. Libraries were pooled and sequenced paired-end for 300 cycles using the Illumina  
660 HiSeq system. Reads were mapped to the V117 genome in CLC Genomics Workbench. Mapping  
661 graphs were generated to identify deleted (zero coverage) regions, and basic variant detection  
662 was performed on read mappings to identify smaller SNPs, deletions, and insertions using the  
663 default parameters.

664

### 665 **Dataset S1. Changes in gene expression resulting from CRISPR self-targeting and LVX.**

666 The fold changes of gene expression for LVX (FC-LVX) and CRISPR (FC-CRISPR) are indicated  
667 for all genes that were differentially regulated as described in the transcriptomics analysis section.  
668 Also included are sheets which categorize genes up- and down-regulated by CRISPR or LVX.  
669 For these sheets, if the fold change of gene expression was  $>2$  but the P-Value was  $>0.05$ , a fold  
670 change of 1 was manually entered; the true fold change value can be found in the “master” sheet.

671

|               | V583 pGR- <i>tetM</i> | V583 pGR-IS256 | V649 pGR- <i>tetM</i> | V649 pGR-IS256 |
|---------------|-----------------------|----------------|-----------------------|----------------|
| Levofloxacin  | 1                     | 1              | 1                     | 0.5            |
| Ciprofloxacin | 1                     | 1              | 1                     | 0.5            |

**Table S1. Fluoroquinolone minimum inhibitory concentrations.** Single transconjugant colonies were suspended in 5 mL BHI and used as inocula in broth microdilution antibiotic susceptibility assays. Units of concentrations are  $\mu\text{g/ml}$ .

| Primer Name                       | Sequence (5'-3')                                          | Use                                                |
|-----------------------------------|-----------------------------------------------------------|----------------------------------------------------|
| PbacA CR2 lin rev                 | TTTATTTTGGATGCAAGCAATAACATAAAAAACCACCATTTCATG             | Insert PbacA into pCR2- <i>ermB</i>                |
| PbacA erm lin for                 | CTACATGGGTATAATAGCAATGAAATGTTGAAGAAGGATTCTACAAGCG         | Insert PbacA into pCR2- <i>ermB</i>                |
| Tet lin rev                       | CGAAGCTTACCGAATCTGAACAATGGGATAGTTTATAGATCATGTTGTTAG       | Create pGR- <i>tetM</i>                            |
| Tet lin for                       | TTTCATTGCTATTATACCCATG                                    | Create pGR- <i>tetM</i>                            |
| Van lin for                       | AGGAACATGATGTGTGTTTTAGAGTCATGTTGTTAG                      | Create pGR- <i>vanB</i>                            |
| Van lin rev                       | CCGAGCAACCCGCCGATTTTCATTGCTATTATACCCATG                   | Create pGR- <i>vanB</i>                            |
| Met lin for                       | GCTGGTTAGAGCAAAGTTTTAGAGTCATGTTGTTAG                      | Create pGR-met                                     |
| Met lin rev                       | TGAGCTAATGGTCCATTTCATTGCTATTATACCCATG                     | Create pGR-met                                     |
| 1216 lin for                      | TAGAATTTATTGCGTCTCTTTACTGGACGAGTTTTAGAGTCATGTTGTTAG       | Create pGR-IS1216                                  |
| 1216 lin rev                      | TTTCATTGCTATTATACCCATG                                    | Create pGR-IS1216                                  |
| 256 lin for                       | AAAAATGGCCATCACGTGTTGTTTTAGAGTCATGTTGTTAG                 | Create pGR-IS256                                   |
| 256 lin rev                       | ATGGCCATTTTTCCACCACAGTTTCATTGCTATTATACCCATG               | Create pGR-IS256                                   |
| NPV1 Lin For                      | ATACGGTCACACAGGAATTGCAACCGGAGGTTTTAGAGTCATGTTGTTAG        | Create pGR-NPV1                                    |
| NPV1 Lin Rev                      | TTTCATTGCTATTATACCCATG                                    | Create pGR-NPV1                                    |
| PbacA Cas9 for                    | CTACATGGGTATAATAGCAATGAAATAGTAATTTAAAAAAGGAGTGG           | Insert PbacA into the <i>cas9</i> promoter         |
| PbacA Cas9 rev                    | TTTATTTTGGATGCAAGCAATAACACTCTGAATGATTTTTATTCTATGC         | Insert PbacA into the <i>cas9</i> promoter         |
| Spe pheS for                      | GAGGATGAGGAGGCGAATTGC                                     | Create pCE- <i>vanB</i>                            |
| pLZ12 MCS rev                     | TCCACTCCTGAATCCCATTC                                      | Create pCE- <i>vanB</i> and pGR- <i>ermB</i>       |
| pCE- <i>vanB</i> Arm1 for         | AGAATTTCTGGAATGGGATTCAGGAGTGGAGCGAACCAATGAGAAAAAGTATG     | Create pCE- <i>vanB</i>                            |
| pCE- <i>vanB</i> Arm1 rev         | GCGGATCGAATTTTTGCTGTAACCTCTTCAAAGTTAAAG                   | Create pCE- <i>vanB</i>                            |
| pCE- <i>vanB</i> Arm2 for         | AAAGGAGTTTACAGCAAAAATTCGATCCGCACTAC                       | Create pCE- <i>vanB</i>                            |
| pCE- <i>vanB</i> Arm2 rev         | ATATTCAAGGCAATCTGCCTCCTCATCTCTAAAAACAAAAACCATTTCATAC      | Create pCE- <i>vanB</i>                            |
| del <i>vanB</i> screen for        | ATCATCACACCCCATACGGC                                      | Screen for <i>vanB</i> edit                        |
| del <i>vanB</i> screen rev        | GGCCAGTGATTTGTCATGC                                       | Screen for <i>vanB</i> edit                        |
| pCE ori for                       | TTTCTGAACCGACTTCTCTTTTTTC                                 | Create pCE- <i>pstB</i> and pCE- <i>pstSCAB</i>    |
| pCE pheS cat rev                  | AAGAAGGATATGGATCTGGAG                                     | Create pCE- <i>pstB</i> and pCE- <i>pstSCAB</i>    |
| pCE- <i>pstB</i> pheS cat for     | TAACCTAAACAAAAGCGCCTTAGCTCTGCTGTTTTAGAGTCATGTTGTTAGAATGG  | Create pCE- <i>pstB</i> , to delete <i>pstB</i>    |
| pCE- <i>pstB</i> ori rev          | GACAGAGCTAAGGCGCTTTTGTAAAGTTATTTGATTGCTATTATACCCATGTAG    | Create pCE- <i>pstB</i> , to delete <i>pstB</i>    |
| pCE- <i>pstB</i> Arm1 for         | ATATTACAGCTCCAGATCCATATCCTTCTTCAACGTTCTTTGGTCTTTAGCC      | Create pCE- <i>pstB</i> , to delete <i>pstB</i>    |
| pCE- <i>pstB</i> Arm1 rev         | ATCTTGCTCCTCCTACATGCTAATCCCTAACATTAAGC                    | Create pCE- <i>pstB</i> , to delete <i>pstB</i>    |
| pCE- <i>pstB</i> Arm2 for         | AGGGGAATTAGCATGTAGGAGGAGCAAGATGGGC                        | Create pCE- <i>pstB</i> , to delete <i>pstB</i>    |
| pCE- <i>pstB</i> Arm2 rev         | GAAGCGAAAAAGGAGAAGTCCGTTTCAGAAAGTTGTAACGCAATCATTTCAAACCTC | Create pCE- <i>pstB</i> , to delete <i>pstB</i>    |
| pCE- <i>pstSCAB</i> pheS cat for  | TAACCTAAACAAAAGCGCCTTAGCTCTGCTGTTTTAGAGTCATGTTGTTAGAATGG  | Create pCE- <i>pstSCAB</i> , to delete <i>pstB</i> |
| pCE- <i>pstSCAB</i> ori rev       | GACAGAGCTAAGGCGCTTTTGTAAAGTTATTTGATTGCTATTATACCCATGTAG    | Create pCE- <i>pstSCAB</i> , to delete <i>pstB</i> |
| pCE- <i>pstSCAB</i> Arm1 for      | ATATTACAGCTCCAGATCCATATCCTTCTTATGACTGTTGCCTCAGCAAG        | Create pCE- <i>pstSCAB</i> , to delete <i>pstB</i> |
| pCE- <i>pstSCAB</i> Arm1 rev      | AGAAATGTAATCTTCCATGATTCATTATTCCTCAATT                     | Create pCE- <i>pstSCAB</i> , to delete <i>pstB</i> |
| pCE- <i>pstSCAB</i> Arm2 for      | AATAATGAATCGATGGAAGATTACATTTCTGGTAAATTTGG                 | Create pCE- <i>pstSCAB</i> , to delete <i>pstB</i> |
| pCE- <i>pstSCAB</i> Arm2 rev      | GAAGCGAAAAAGGAGAAGTCCGTTTCAGAAATTTTCAGTTGCCATATTTCTAATA   | Create pCE- <i>pstSCAB</i> , to delete <i>pstB</i> |
| pCE- <i>pstSCAB</i> screen for    | AGGTTAGTTATTTCAATGCGTCC                                   | Screen for <i>pstSCAB</i> edit                     |
| pCE- <i>pstSCAB</i> screen rev    | GCCTTCACGGATTTATGGACGGC                                   | Screen for <i>pstSCAB</i> edit                     |
| pKH12 cat lin for                 | CATGAGATAATGCCGACTGTAC                                    | Create pGR- <i>ermB</i>                            |
| pCE-3217 ori Rev                  | GATAAATAAGCACTCGGAATTCACAGATCGTTTCATTGCTATTATACCCATGTAG   | Create pCE-3217, to delete EF3217                  |
| pCE-3217 pheS Cat For             | GATCGTGGAATTCAGAGTGCCTTATTATCGTTTTAGAGTCATGTTGTTAGAATGG   | Create pCE-3217, to delete EF3217                  |
| pCE-3217 Arm1 For                 | ATATTACAGCTCCAGATCCATATCCTTCTTGTGCTGTAAGCTTCACAGTTCTC     | Create pCE-3217, to delete EF3217                  |
| pCE-3217 Arm1 Rev                 | AAAGTGGCTTTTTATTCTAAATTATCCATTTGTTGCTAGTTCCC              | Create pCE-3217, to delete EF3217                  |
| pCE-3217 Arm2 For                 | ATGGATAATTTAGAATAAAAAAGCCACTTTCCTCTGG                     | Create pCE-3217, to delete EF3217                  |
| pCE-3217 Arm2 Rev                 | GAAGCGAAAAAGGAGAAGTCCGTTTCAGAAATAAAAGTTTGAACCCGCAATTC     | Create pCE-3217, to delete EF3217                  |
| pCE- <i>tetKI</i> ori Rev         | ACATCATTTGACAAAGAGCCTTTATACTACTTTCATTGCTATTATACCCATGTAG   | Create pCE- <i>tetKI</i> , to knock-in <i>tetM</i> |
| pCE- <i>tetKI</i> pheS Cat For    | GTAGTATAAAGGCTCTTTGTCAAATGATGTTTTAGAGTCATGTTGTTAGAATGG    | Create pCE- <i>tetKI</i> , to knock-in <i>tetM</i> |
| pCE- <i>tetKI</i> Arm1 For        | ATATTACAGCTCCAGATCCATATCCTTCTTAAAGAAACAAAATTTGTATCAGAAGC  | Create pCE- <i>tetKI</i> , to knock-in <i>tetM</i> |
| pCE- <i>tetKI</i> Arm1 Rev        | CCGTTCTTTTCAAGTACTCTCATTTTTGGTGCTAAAAAG                   | Create pCE- <i>tetKI</i> , to knock-in <i>tetM</i> |
| pCE- <i>tetKI</i> <i>tetM</i> For | ACCAAAAATGAGAGTACTTGAAGAAGCGGGAGTAATTGG                   | Create pCE- <i>tetKI</i> , to knock-in <i>tetM</i> |
| pCE- <i>tetKI</i> <i>tetM</i> Rev | TAAGATTTCTTTTATCCACATACAGGACACAATATCC                     | Create pCE- <i>tetKI</i> , to knock-in <i>tetM</i> |
| pCE- <i>tetKI</i> Arm2 For        | GTCCTGTATGTGGAATAAAGAGAAATCTTGAATAATTTGGAC                | Create pCE- <i>tetKI</i> , to knock-in <i>tetM</i> |
| pCE- <i>tetKI</i> Arm2 Rev        | GAAGCGAAAAAGGAGAAGTCCGTTTCAGAAATTTGCTCGCTTAAAGAGAATAC     | Create pCE- <i>tetKI</i> , to knock-in <i>tetM</i> |
| pCE- <i>tetKI</i> Screen For      | GGTGGGCGAGAAGCTGAAGG                                      | Create pCE- <i>tetKI</i> , to knock-in <i>tetM</i> |
| pCE- <i>tetKI</i> Screen Rev      | ACCTTCCGCGCATATTTATTAACCTCC                               | Create pCE- <i>tetKI</i> , to knock-in <i>tetM</i> |
| qpp1C For                         | TTGCCCTTTTTGTGCCCTTTTCC                                   | qPCR for circular phage01                          |
| qpp1C Rev                         | TTTTTGTGAAAATTTGGACCAAATCCTTGGG                           | qPCR for circular phage01                          |
| qvanB For                         | AAGCCGATAGTCTCCCGCC                                       | qPCR for <i>vanB</i>                               |
| qvanB Rev                         | CCATCTCCCGCATTTGCC                                        | qPCR for <i>vanB</i>                               |
| qcas9 For                         | AAAAAGCAATGGCCGAATCG                                      | qPCR for <i>cas9</i>                               |
| qcas9 Rev                         | GGTCAGACGTTGGAATTTCCG                                     | qPCR for <i>cas9</i>                               |
| qrecA For                         | TGGTGAGATGGGAGCGAGCC                                      | qPCR for <i>recA</i>                               |
| qrecA Rev                         | TCAGGATTTCCGAACATCACGCC                                   | qPCR for <i>recA</i>                               |

**Table S2. Primers used in this study**



| Organism           | Strain Name            | Description                                                                                                                                                                                                                                     | Ref        |
|--------------------|------------------------|-------------------------------------------------------------------------------------------------------------------------------------------------------------------------------------------------------------------------------------------------|------------|
| <i>E. coli</i>     | EC1000                 | <i>E. coli</i> cloning host, providing <i>repA</i> in trans. F <sup>-</sup> , <i>araD139</i> ( <i>ara ABC-leu</i> )7679, <i>galU</i> , <i>galK</i> , <i>lacX74</i> , <i>rspL</i> , <i>thi</i> , <i>repA</i> of pWV01 in <i>glgB</i> , <i>km</i> | (39)       |
| <i>E. faecalis</i> | V583                   | MDR bloodstream isolate. Van <sup>R</sup> , Gent <sup>R</sup> , Erm <sup>R</sup>                                                                                                                                                                | (6)        |
|                    | V649                   | V583 + CRISPR1- <i>cas9</i> /tracrRNA in the GISE, a neutral integration site on the <i>E. faecalis</i> chromosome                                                                                                                              | (19)       |
|                    | V117                   | V649 with CRISPR1- <i>cas9</i> under the control of P <sub>bacA</sub>                                                                                                                                                                           | This study |
|                    | CK111SSp (pCF10-101)   | Spontaneous streptomycin-resistant derivative of CK111(pCF10-101)                                                                                                                                                                               | (19, 29)   |
|                    | C173                   | CK111SSp(pCF10-101) with <i>ermB</i> disrupting the native <i>cas9</i> in the CRISPR1-Cas locus.                                                                                                                                                | (19)       |
|                    | V200                   | V117 ΔEF3217                                                                                                                                                                                                                                    | This study |
|                    | OG117                  | OG1RF with P <sub>bacA</sub> - <i>cas9</i> in the GISE                                                                                                                                                                                          | This study |
|                    | V202                   | V200 “CRISPR edited” with pGR- <i>ermB</i> . Erm <sup>S</sup>                                                                                                                                                                                   | This study |
|                    | V204                   | V200 “CRISPR edited” with pGR- <i>ermB</i> . Erm <sup>S</sup> , Gent <sup>S</sup>                                                                                                                                                               | This study |
|                    | ATCC 29212             | Used to detect infectious phage particles                                                                                                                                                                                                       | (42)       |
|                    | OG1RF                  | Oral commensal isolate                                                                                                                                                                                                                          | (7)        |
|                    | V649 Δ <i>vanB</i>     | V649 with a 100bp deletion in <i>vanB</i>                                                                                                                                                                                                       | This study |
|                    | V117 Δ <i>vanB</i>     | V117 with a 100bp deletion in <i>vanB</i>                                                                                                                                                                                                       | This study |
|                    | V117 Δ <i>pstB</i>     | V117 Δ <i>pstB</i>                                                                                                                                                                                                                              | This study |
|                    | V117 Δ <i>pstSCAB</i>  | V117 Δ <i>pstSCAB</i>                                                                                                                                                                                                                           | This study |
|                    | V200 Δ <i>pstSCAB</i>  | V200 Δ <i>pstSCAB</i>                                                                                                                                                                                                                           | This study |
|                    | V200 + <i>tetM</i>     | V200 with <i>tetM</i> inserted between EF1866 and EF1867                                                                                                                                                                                        | This study |
|                    | OG117 Δ <i>pstSCAB</i> | OG117 Δ <i>pstSCAB</i>                                                                                                                                                                                                                          | This study |

| Plasmid                | Description                                                                                                             | Ref        |
|------------------------|-------------------------------------------------------------------------------------------------------------------------|------------|
| pCR2- <i>ermB</i>      | Targets <i>ermB</i> on pTEF1                                                                                            | (19)       |
| pSR- <i>ermB</i>       | Intermediate plasmid with the <i>ermB</i> -targeting spacer under control of P <sub>bacA</sub> , no first CRISPR repeat | This study |
| pGR- <i>ermB</i>       | pSR- <i>ermB</i> containing <i>pheS</i> *                                                                               | This study |
| pGR- <i>tetM</i>       | Isogenic to pGR- <i>ermB</i> but with a spacer targeting <i>tetM</i>                                                    | This study |
| pGR- <i>vanB</i>       | Isogenic to pGR- <i>ermB</i> but with a spacer targeting <i>vanB</i>                                                    | This study |
| pGR- <i>met</i>        | Isogenic to pGR- <i>ermB</i> but with a spacer targeting tRNA-met                                                       | This study |
| pGR- <i>IS1216</i>     | Isogenic to pGR- <i>ermB</i> but with a spacer targeting <i>IS1216</i>                                                  | This study |
| pGR- <i>IS256</i>      | Isogenic to pGR- <i>ermB</i> but with a spacer targeting <i>IS256</i>                                                   | This study |
| pGR-NPV1               | Isogenic to pGR- <i>ermB</i> but with a spacer targeting bacteriophage NPV1                                             | This study |
| pCE- <i>vanB</i>       | CRISPR editing construct to delete 100 bp from <i>vanB</i>                                                              | This study |
| pCE- <i>pstB</i>       | CRISPR editing construct to delete <i>pstB2</i>                                                                         | This study |
| pCE- <i>pstSCAB</i>    | CRISPR editing construct to delete <i>pstS2</i> , <i>pstA</i> , <i>pstC</i> , <i>pstB2</i> , and <i>pstB</i>            | This study |
| pCE-3217               | CRISPR editing construct used to delete EF3217                                                                          | This study |
| pCE-tetKI              | CRISPR editing construct used to knock in <i>tetM</i>                                                                   | This study |
| pKH12                  | Conjugative cloning vector                                                                                              | (19)       |
| pKHS67                 | pKH12 containing protospacer target for S67                                                                             | (19)       |
| pKHS5                  | pKH12 containing protospacer target for S5                                                                              | This study |
| pG19                   | Allelic-exchange vector to knock in <i>cas9</i>                                                                         | (18)       |
| pG19-P <sub>bacA</sub> | Allelic-exchange vector to knock in P <sub>bacA</sub> - <i>cas9</i>                                                     | This study |

**Table S3. Strains and plasmids used in this study.**

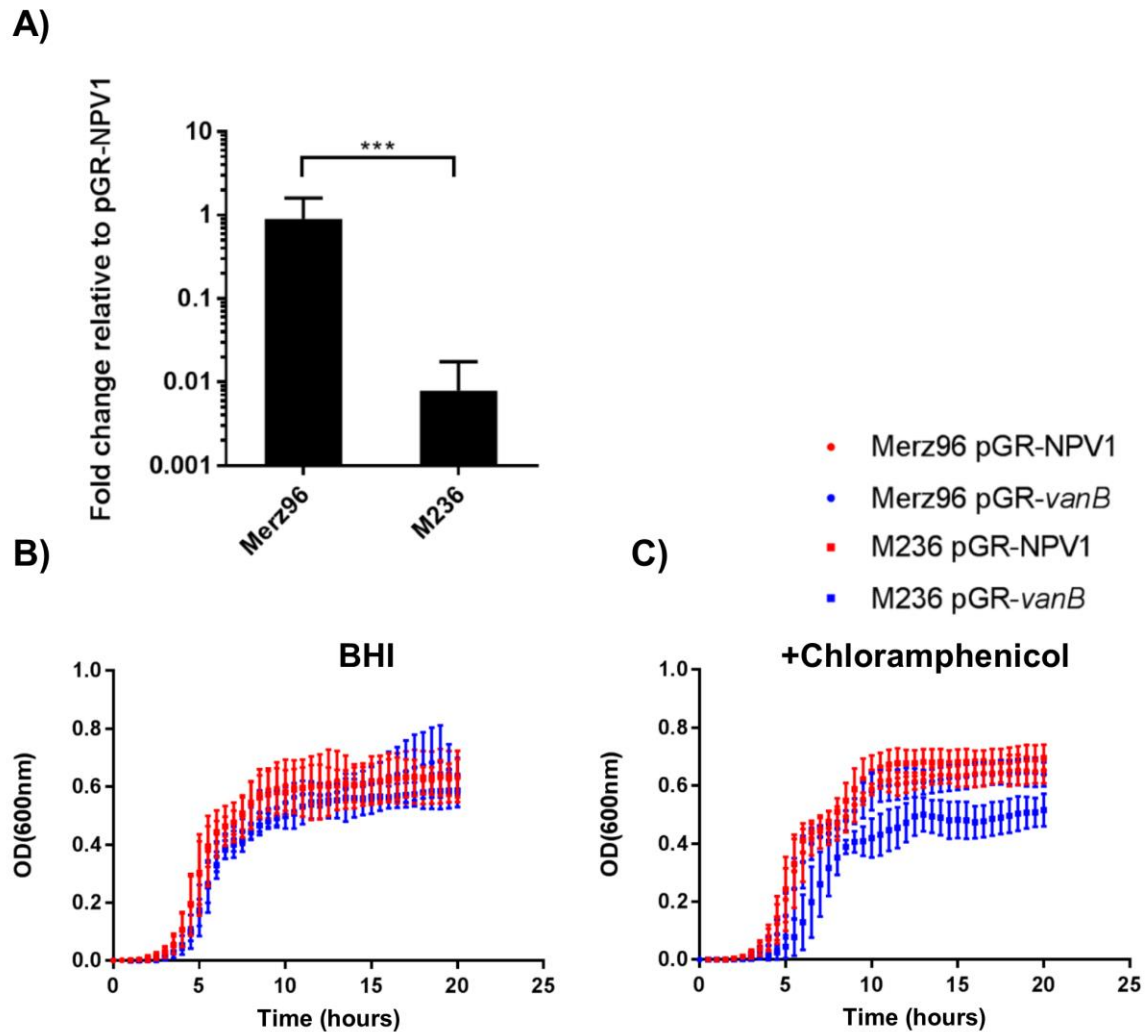

**Figure S1. Chromosomal targeting in Merz96 and M236.** A) Conjugation frequencies of pGR-*vanB* (1 predicted cut) relative to pGR-NPV1 (control) are shown for Merz96 and M236 (Merz96 + *cas9*) recipients as transconjugants per recipient (n=5). Merz96 or M236 (Merz96 + *cas9*) transconjugants containing pGR-NPV1 or pGR-*vanB* were grown in B) BHI or C) BHI supplemented with chloramphenicol and OD<sub>600nm</sub> was measured (n=3). \*\*\*P<0.001

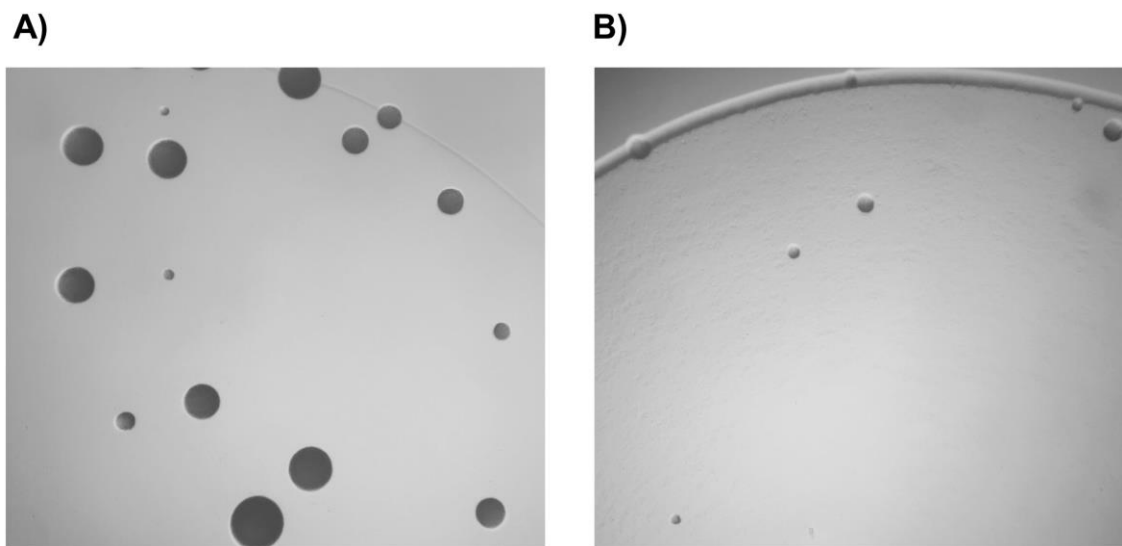

**Figure S2. CRISPR chromosomal targeting results in growth defects.** A) V649 pGR-*tetM* (control) transconjugants on vancomycin and chloramphenicol selection after 1 day of incubation are shown. B) Same as A), but showing V649 pGR-*IS256* (10 cuts) transconjugants. Pictures shown are at equal zoom.

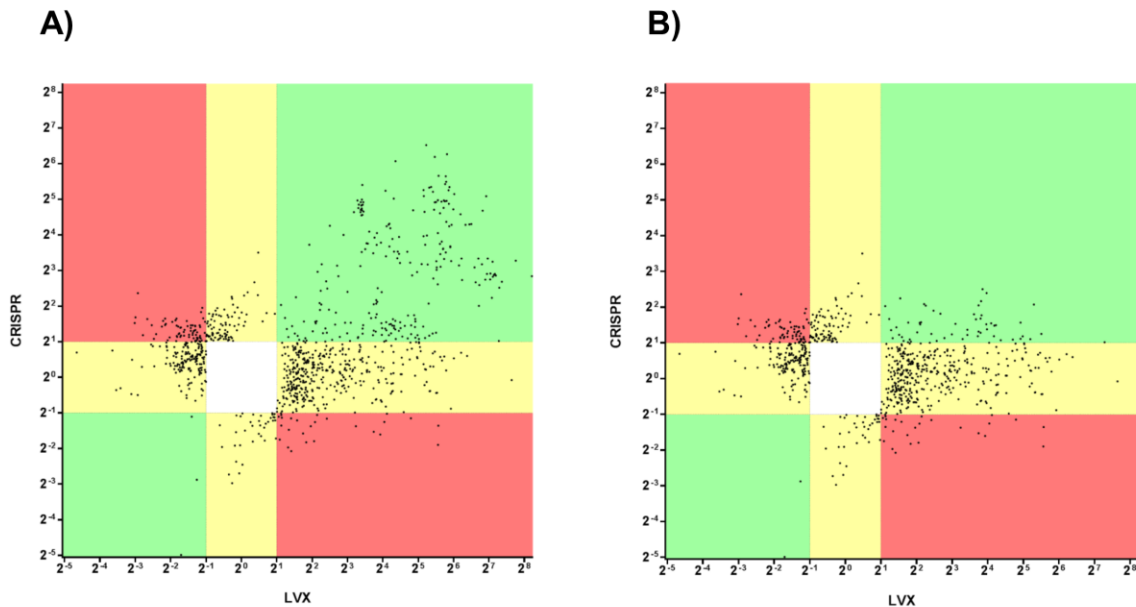

**Figure S3. Relationship among changes in gene expression between LVX treatment and CRISPR self-targeting.** A) All genes (except those with fold changes of infinity) that were significantly (see SI materials and methods) differentially regulated *either* by LVX or CRISPR were plotted, irrespective of individual P-value. The horizontal axis represents the fold change of gene expression caused by LVX, and the vertical axis represents the corresponding fold change of gene expression caused by CRISPR self-targeting. Green regions indicate genes that were similarly differentially regulated by CRISPR and LVX. Red regions indicate genes that were oppositely differentially regulated by CRISPR and LVX. Yellow regions indicate genes that were differentially regulated by either CRISPR or LVX, but not both. B) is the same as A) except lacking genes located on prophage elements.

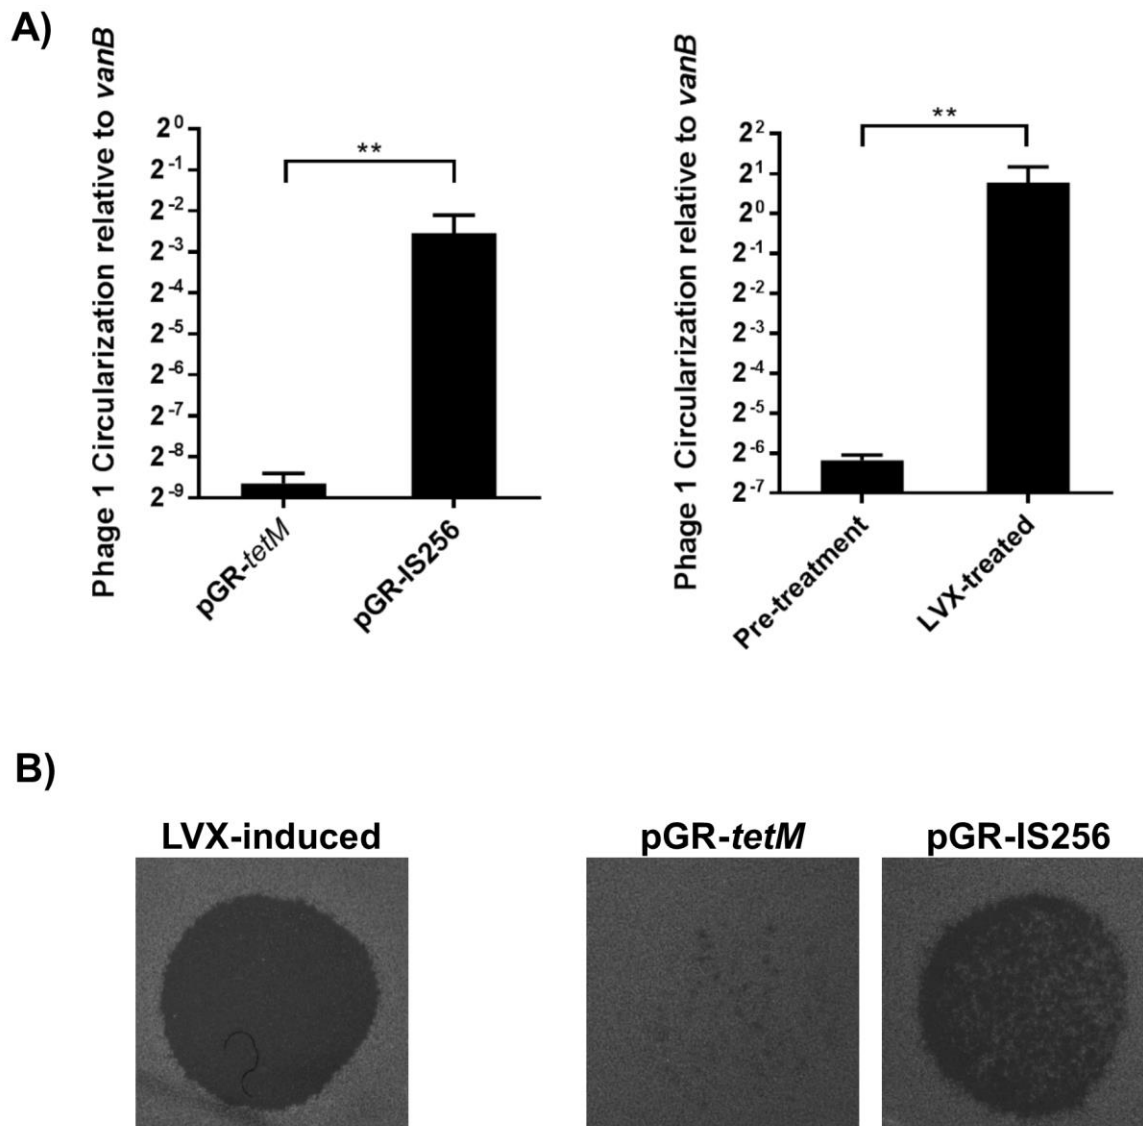

**Figure S4. Detection of circular phage DNA and infectious phage particles.** A) RT-qPCR on genomic DNA harvested from cultures treated by CRISPR or LVX is shown (n=3). Phage01 circularization was normalized to *vanB*. B) Undiluted filtrates of supernatants from *E. faecalis* cultures were spotted on lawns of ATCC 29212. For generating phage particles, cultures were treated identically to those prepared for transcriptomics analysis, described in SI materials and methods. \*\*P<0.01

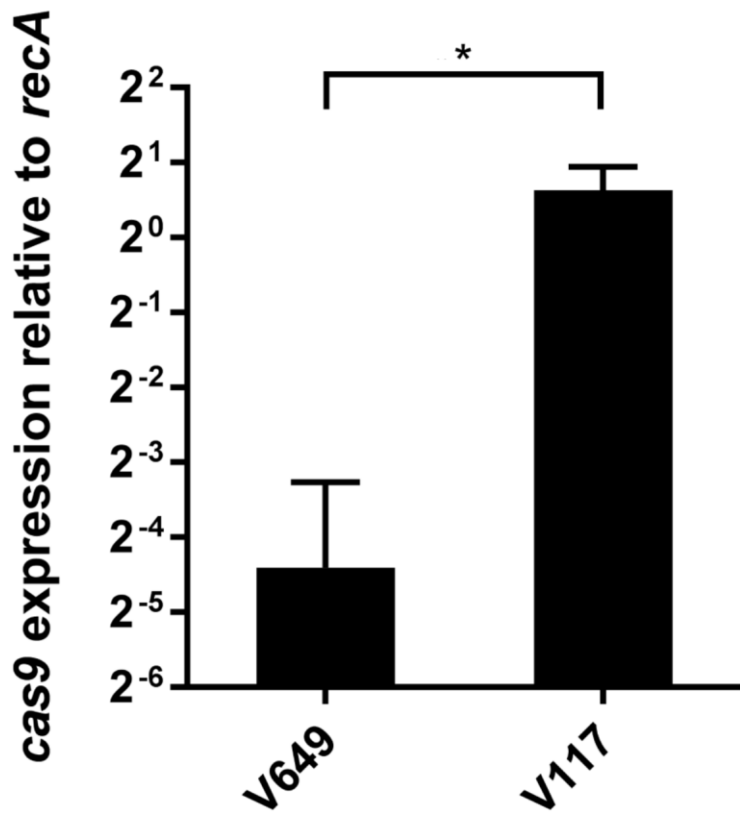

**Figure S5. Expression of *cas9* in V117 is increased.** *cas9* expression was measured by RT-qPCR for V649 (V583 + *cas9*) and V117 (V583 + P<sub>bacA</sub>-*cas9*) (n=3). Expression was normalized to *recA*. \*P<0.05

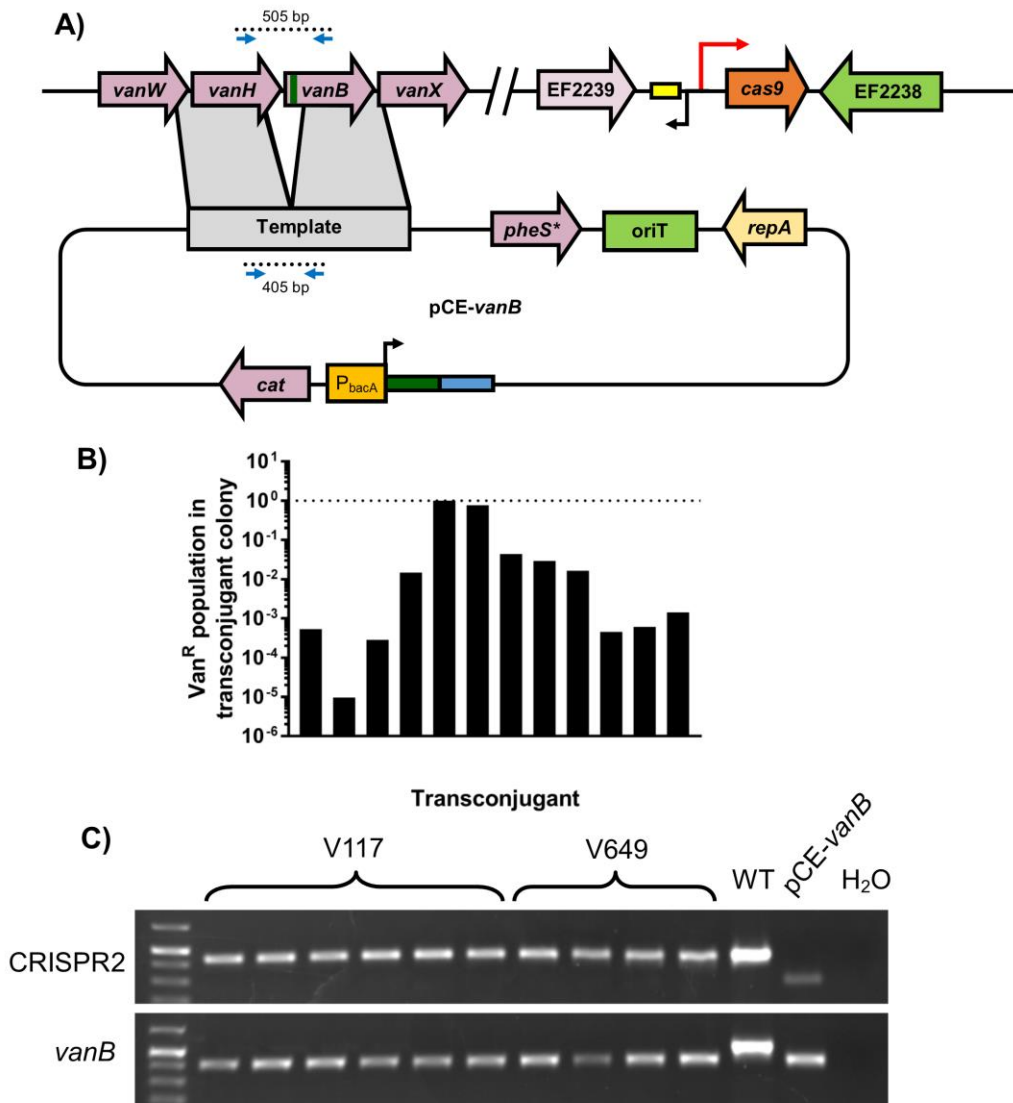

**Figure S6. CRISPR editing of *vanB*.** A) Plasmid schematic and PCR screening primers are shown. B) Twelve initial V117 pCE-*vanB* transconjugant colonies were resuspended in PBS and plated on selective and non-selective agar to quantify vancomycin-resistant and total CFU. C) Representative CRISPR editing in vancomycin-sensitive clones after passaging and counterselection. Edited products are 100 bp smaller than unedited products. CRISPR2 was amplified as a control to verify that edited clones are not donor strains, which possess a longer CRISPR2 array than V117 and V649 (17).

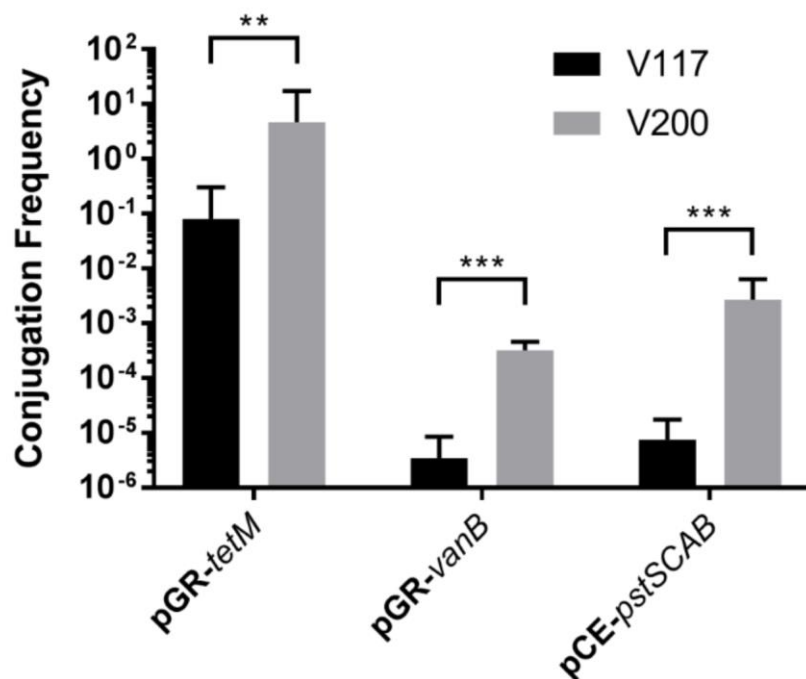

**Figure S7. Deletion of EF3217 increases conjugation frequency.** pGR-*tetM* (control), pGR-*vanB* (targets chromosome), and pCE-*pstSCAB* (used for CRISPR editing) were conjugated into V117 (V583 + P<sub>bacA</sub>-*cas9*) or V200 (V583 + P<sub>bacA</sub>-*cas9* ΔEF3217) and conjugation frequencies are shown as transconjugants per donor (n=3). The limit of detection was 100 CFU/ml. \*\*P<0.01, \*\*\*P<0.001



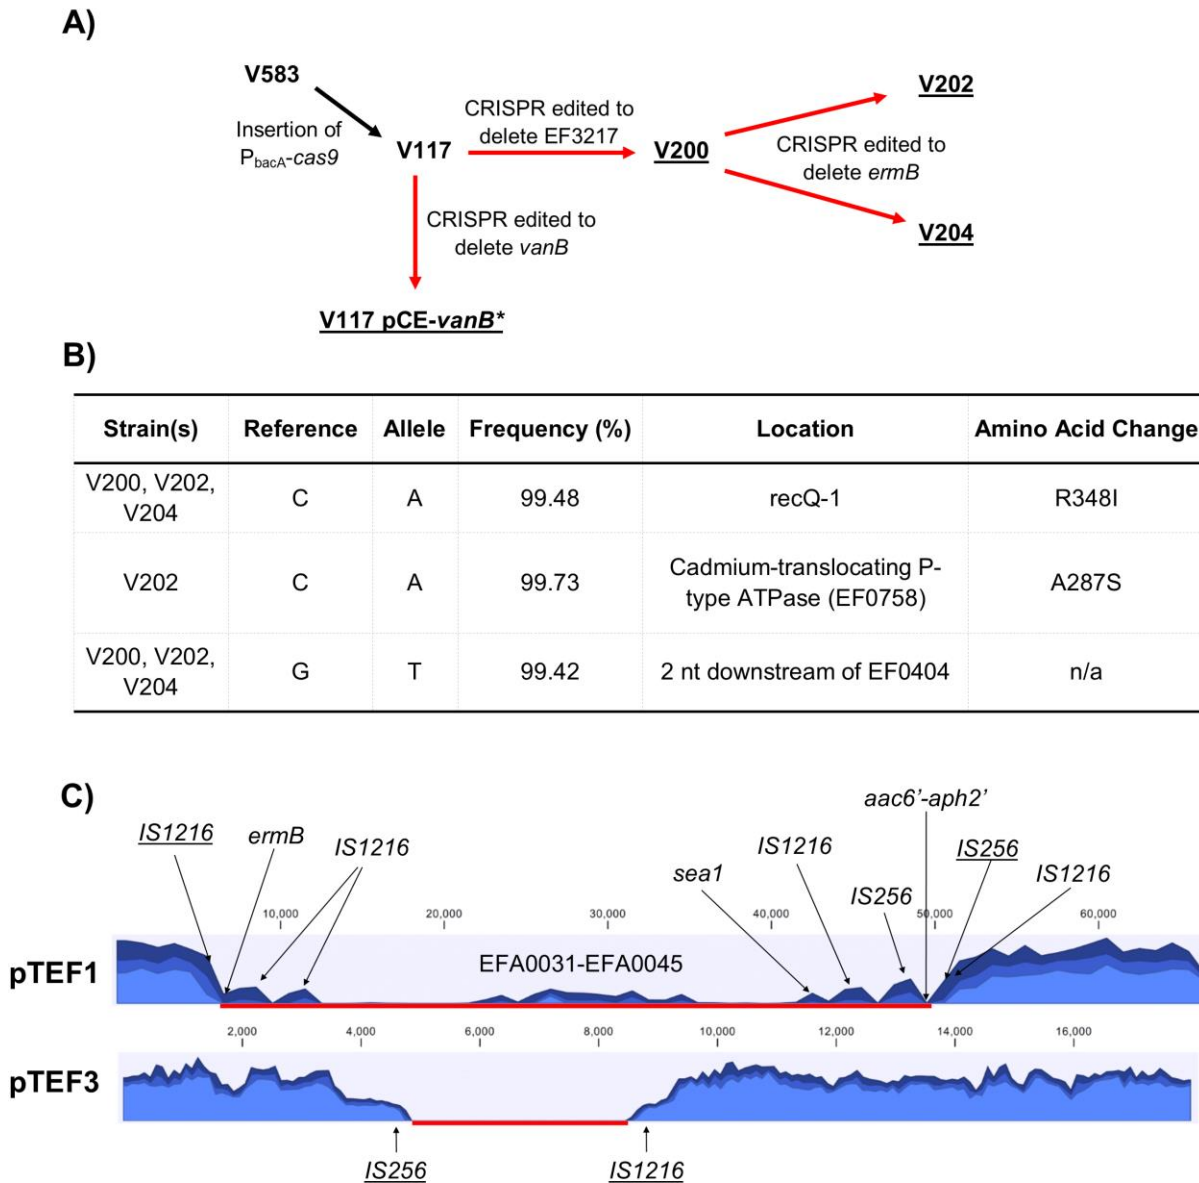

**Figure S8. CRISPR targeting does not induce unintended single nucleotide polymorphisms (SNPs) but drives large scale recombination events.** A) Strain construction is shown. Red arrows indicate CRISPR editing, with the corresponding edits located adjacent to the arrows. The complete genomes of the underlined strains were sequenced. \*pCE-*vanB* was not removed in V117 for this experiment. B) Relevant mutations are shown for the four sequenced strains relative to V117 pCE-*vanB*, since V117 pCE-*vanB* possessed the fewest mutations. V200 (V583 + P<sub>bacA</sub>-

*cas9*  $\Delta$ EF3217) and V204 (V583 + P<sub>bacA</sub>-*cas9*  $\Delta$ EF3217, *erm*<sup>S</sup>, *gent*<sup>S</sup>) differ from V117 pCE-*vanB* by two SNPs, and V202 (V583 + P<sub>bacA</sub>-*cas9*  $\Delta$ EF3217, *erm*<sup>S</sup>) differs from V117 pCE-*vanB* by three SNPs. Mutations that were supposed to occur because of CRISPR editing and large scale recombination events in the pTEF plasmids are not represented in this table, but were confirmed by whole genome sequencing. C) Regions of deletion in pTEF1 and pTEF3 of V204 (V583 + P<sub>bacA</sub>-*cas9*  $\Delta$ EF3217, *erm*<sup>S</sup>, *gent*<sup>S</sup>) are shown as a red line. Relevant genes are indicated as shown, and transposases that were found flanking the deleted region are underlined. Each graph represents the number of reads (from 0-2000) as a function of the nucleotide position of each plasmid. The three lines at each position represent the minimum, mean, and maximum number of reads for each 1000 nt or 100 nt grouping for pTEF1 and pTEF3, respectively. This grouping was automatically performed by CLC Genomics Workbench to display the data effectively when representing the entirety of the plasmid. Reads that mapped within the deleted regions were only those that mapped to multiple locations in the genome. V202 (V583 + P<sub>bacA</sub>-*cas9*  $\Delta$ EF3217, *erm*<sup>S</sup>), which is not shown in this figure, contains a deletion of only *ermB* mediated by recombination between the adjacent IS1216 transposases.

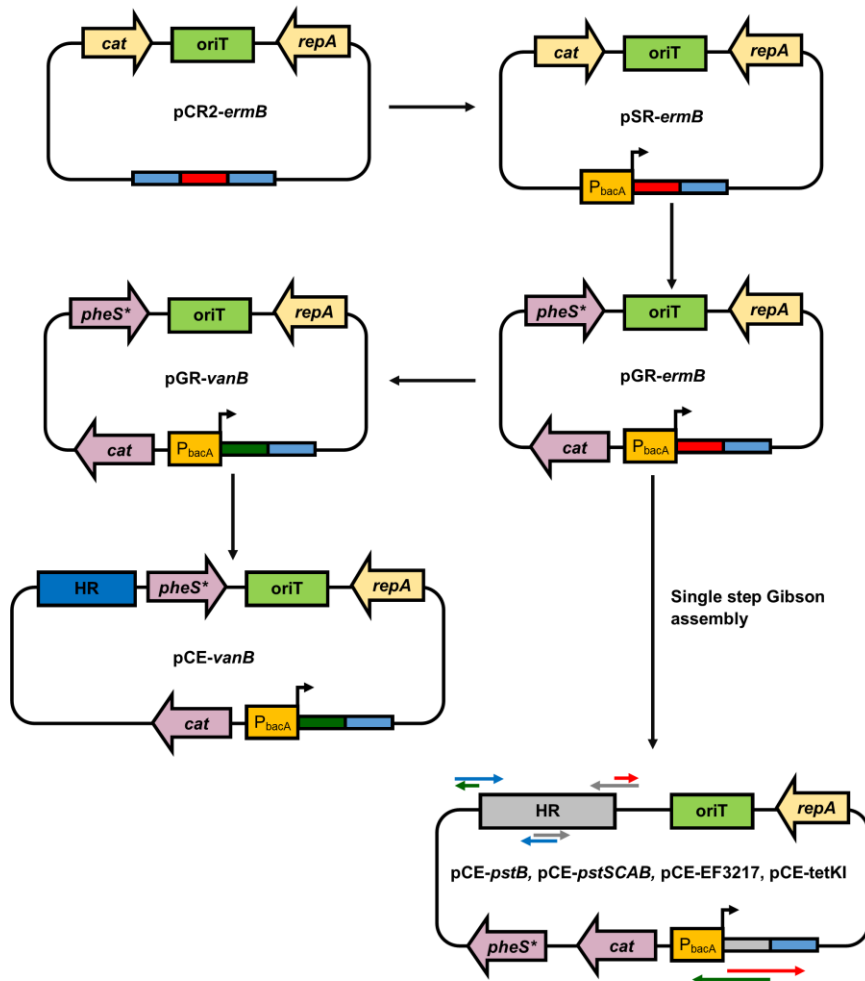

**Figure S9. Plasmid construction scheme.** The general plasmid workflow is shown (components not to scale). CRISPR repeats are depicted by thin, light-blue rectangles; the colored rectangles adjacent to the repeats represent various spacers. All CRISPR editing plasmids can be derived from pGR-*ermB* as either one-step or two-step assemblies. Generic primer schematic for generating CRISPR editing deletion plasmids from a single step is shown as arrows indicating 5'-3' directionality. The primer pairs used in each reaction are colored identically (i.e., the two red arrows represent the primers that are used in the same reaction to amplify one fragment). Homologous overhangs for subsequent Gibson assembly are shown. 30 bp overhangs were used in all cloning procedures.

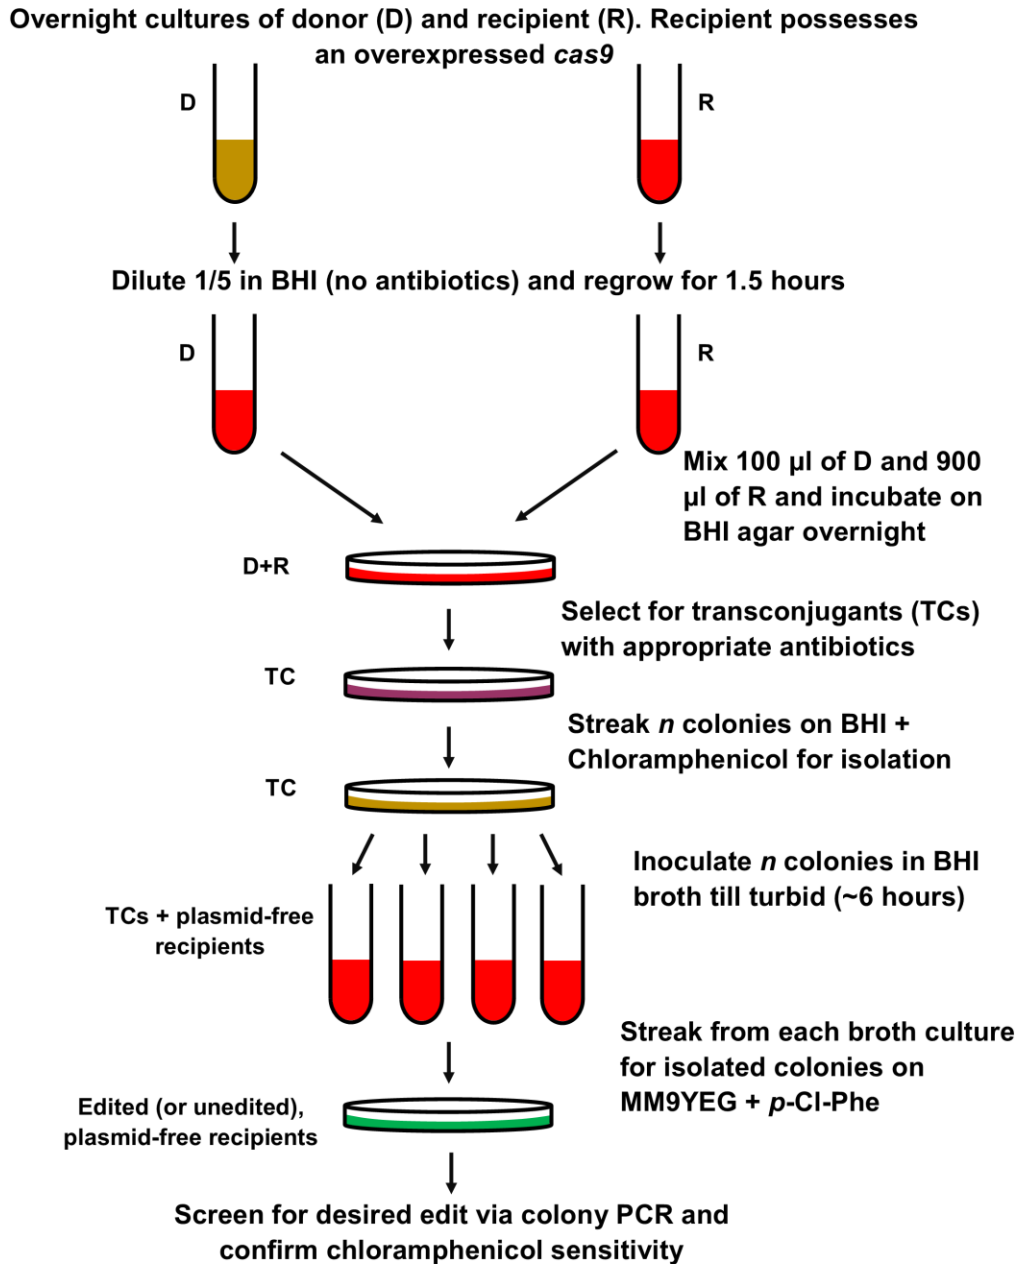

**Figure S10. CRISPR-Cas genome editing protocol for *E. faecalis*.** A workflow for achieving CRISPR-assisted genome editing in *E. faecalis* is shown. Media are color coded. BHI, BHI + chloramphenicol, and MM9YEG + *p*-Cl-Phe are shown in red, brown, and green, respectively. The bacteria present at each step of the process are also indicated. The appropriate number of colonies to screen (*n*) is dependent on each experiment, but we find that screening 6 transconjugants is sufficient.
